# Supplementary material
Source: PubMed Central journal article supplement (PMC5423860)
Supplement: NIHMS852330-supplement-Supp_Fig_S1-03.pdf [file NIHMS852330-supplement-Supp_Fig_S1-03.pdf]

**New *Phytologist* Supporting Information File 1**

Article title: **Diverse mechanisms of resistance to *Pseudomonas syringae* in a thousand natural accessions of *Arabidopsis thaliana***

Authors: André C. Velásquez, Matthew Oney, Bethany Huot, Shu Xu and Sheng Yang He

Article acceptance date: 7 February 2017

The following Supporting Information is available for this article:

**Fig. S1.** Cell death symptom categories observed after inoculation of high bacterial titers in *Arabidopsis* accessions.

**Fig. S2.** Large-scale screen for *Arabidopsis* accessions resistant to *Pseudomonas syringae* pv. *tomato* (*Pst*) DC3000 infection.

**Fig. S3.** Geographic collection origins of *Pseudomonas syringae* pv. *tomato* DC3000-resistant *Arabidopsis* accessions and the susceptible control Col-0.

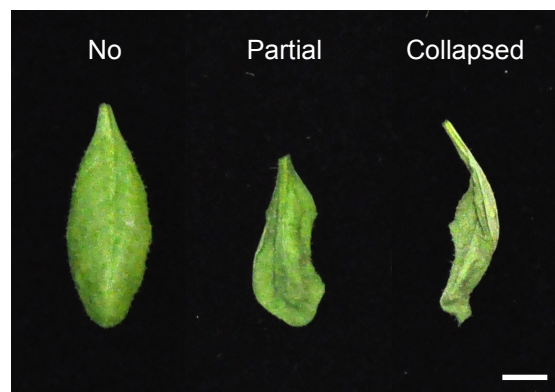

**Fig. S1.** Cell death symptom categories observed after inoculation of high bacterial titers in *Arabidopsis* accessions.

Cell death symptoms 27 hours after infiltration with  $10^8$  CFU ml<sup>-1</sup> of *Pseudomonas syringae* pv. *tomato* DC3000. Categories used for characterizing cell death were: (1) No leaf area showing necrosis. (2) Partial necrosis symptoms. (3) Fully collapsed leaf. White bar length represents 1 cm. Image was composed from leaf's individual images from a single experiment.

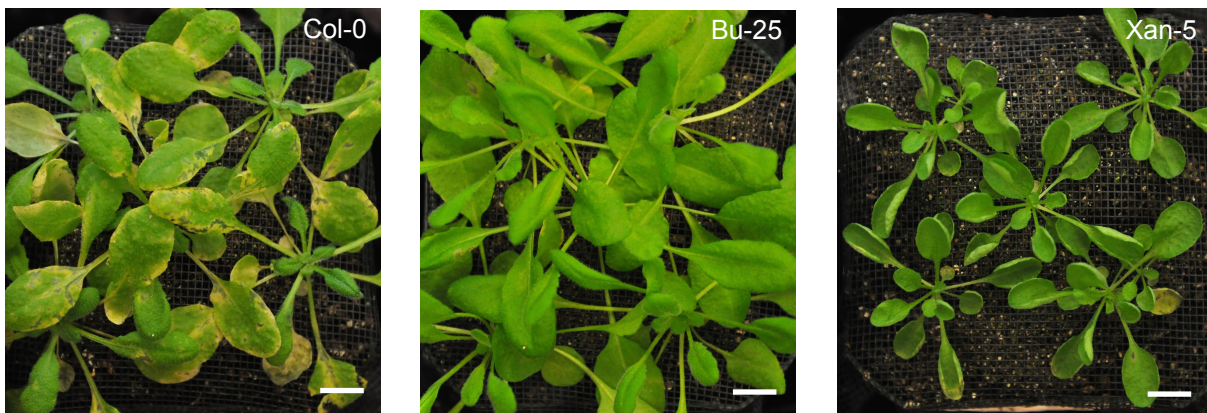

**Fig. S2.** Large-scale screen for *Arabidopsis* accessions resistant to *Pseudomonas syringae* pv. *tomato* (*Pst*) DC3000 infection.

Bacterial symptoms 5 days after dip-inoculation with *Pst* DC3000 at an inoculum of  $2 \times 10^8$  CFU ml<sup>-1</sup>. Col-0 was used as the *Pst* DC3000 susceptible control. This accession is shown next to Bu-25 and Xan-5, two accessions in which no disease symptoms were observed. White bar length is equal to 1 cm.

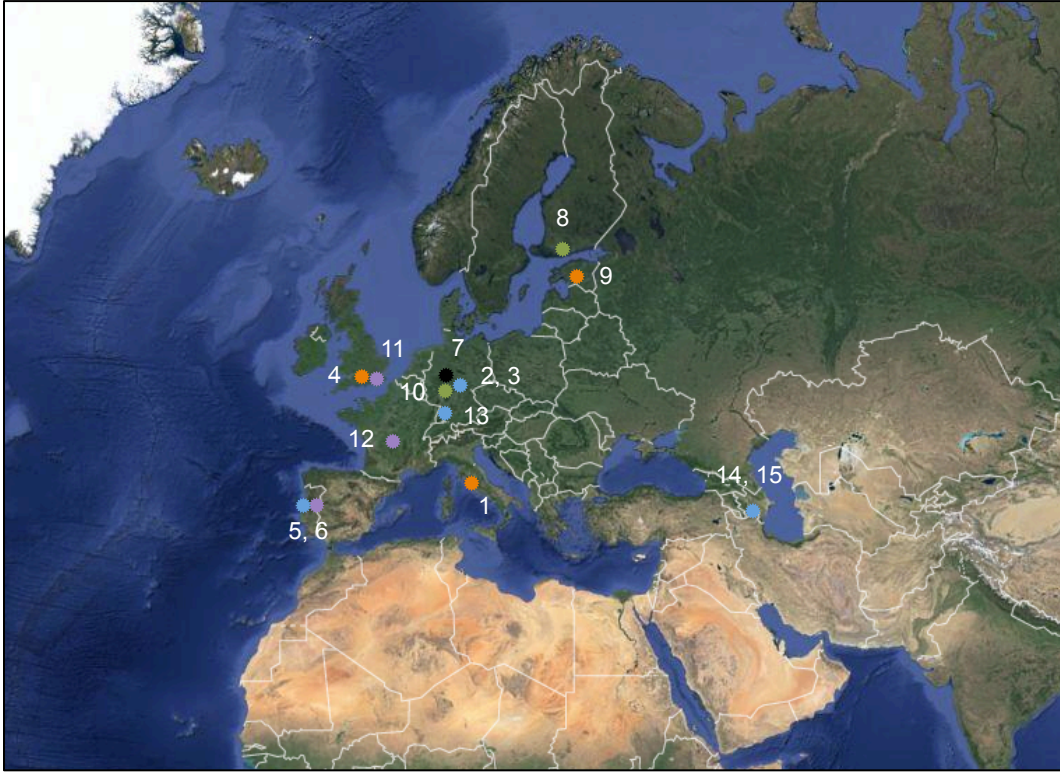

**Fig. S3.** Geographic collection origins of *Pseudomonas syringae* pv. *tomato* DC3000-resistant *Arabidopsis* accessions and the susceptible control Col-0.

(1) Belm-12. (2) Bu-22. (3) Bu-25. (4) CIBC-16. (5) CO. (6) Co-3. (7) Col-0. (8) Es-0. (9) Est-1. (10) Loh-0. (11) PHW-17. (12) Ra-0. (13) Uk-4. (14) Xan-2. (15) Xan-5.

Geographic location is colored according to the type of resistance exhibited by the *Arabidopsis* accession: black, no resistance; green, surface-mediated resistance; blue, hypersensitive-like cell death response; orange, enhanced salicylic acid defenses; and purple, unknown. Map image from Google Maps.
