# Supplementary material
Source: PubMed Central journal article supplement (PMC5423860)
Supplement: NIHMS852330-supplement-Supp_Fig_S12-14.pdf [file NIHMS852330-supplement-Supp_Fig_S12-14.pdf]

***New Phytologist* Supporting Information File 5**

Article title: **Diverse mechanisms of resistance to *Pseudomonas syringae* in a thousand natural accessions of *Arabidopsis thaliana***

Authors: André C. Velásquez, Matthew Oney, Bethany Huot, Shu Xu and Sheng Yang He

Article acceptance date: 7 February 2017

The following Supporting Information is available for this article:

**Fig. S12.** Xan-2 shows the same weak effector-triggered immunity-like recognition of HopAM1 as Xan-5.

**Fig. S13.** AvrPto or AvrPtoB recognition mediates resistance to *Pseudomonas syringae* pv. *tomato* (*Pst*) DC3000 in Bu-22 and Bu-25 *Arabidopsis* accessions.

**Fig. S14.** Mechanisms of resistance against *Pseudomonas syringae* pv. *tomato* (*Pst*) DC3000 identified in *Arabidopsis thaliana* accessions.

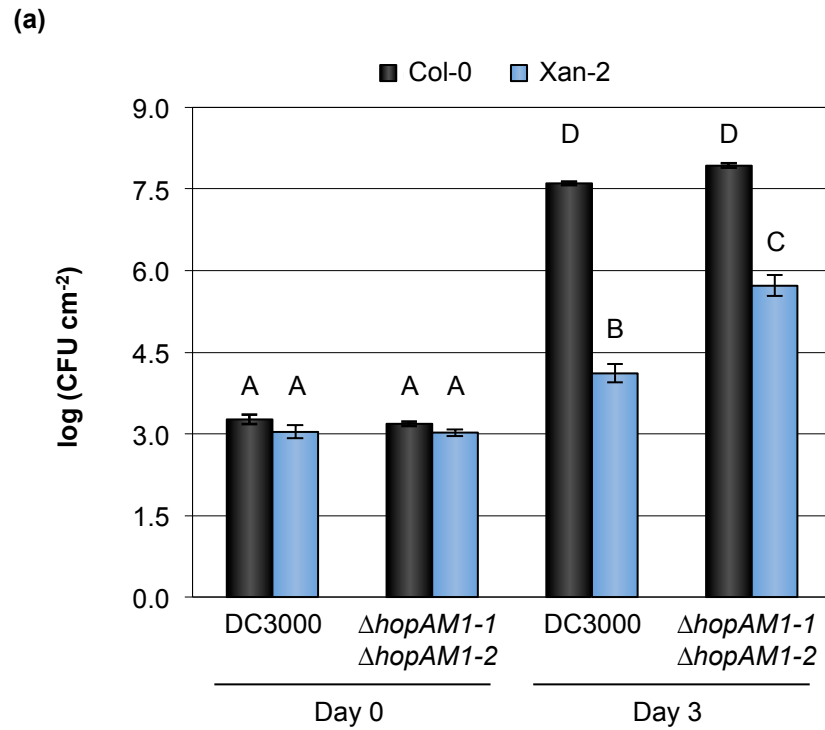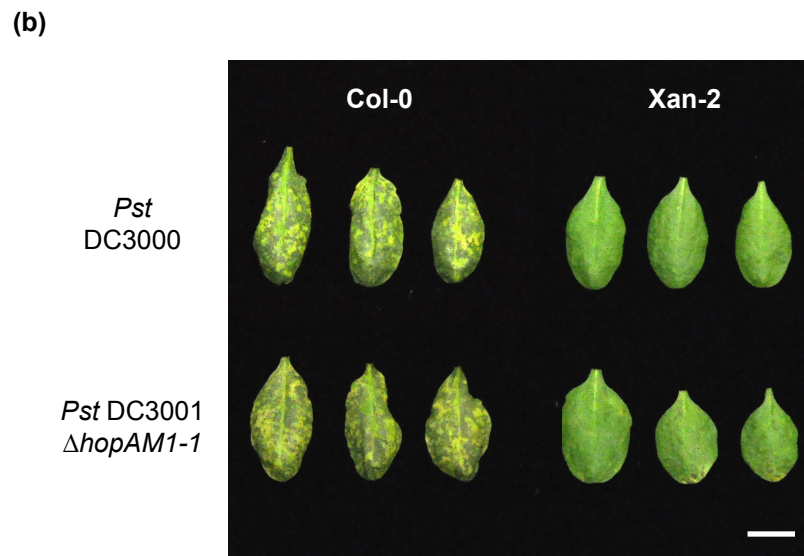

**Fig. S12.** Xan-2 shows the same weak effector-triggered immunity-like recognition of HopAM1 as Xan-5.

(a) *In planta* bacterial growth in Xan-2 and Col-0 Arabidopsis accessions after infiltration with *Pseudomonas syringae* pv. *tomato* (*Pst*) DC3000 and *Pst* DC3001  $\Delta hopAM1-1$  ( $\Delta hopAM1-1 \Delta hopAM1-2$ ) at an inoculum of  $10^6$  CFU ml<sup>-1</sup>. Error bars show the standard error of 3 and 8 biological samples for days 0 and 3, respectively. Letters above each bar indicate similar groups as determined with a Tukey HSD test ( $P < 0.05$ ).

(b) Disease symptoms 3 days after inoculation with *Pst* DC3000 and *Pst* DC3001  $\Delta hopAM1-1$  at an inoculum of  $10^6$  CFU ml<sup>-1</sup>. Image was composed from accessions' individual images from a single experiment. Length of white bar represents 1 cm.

(a)

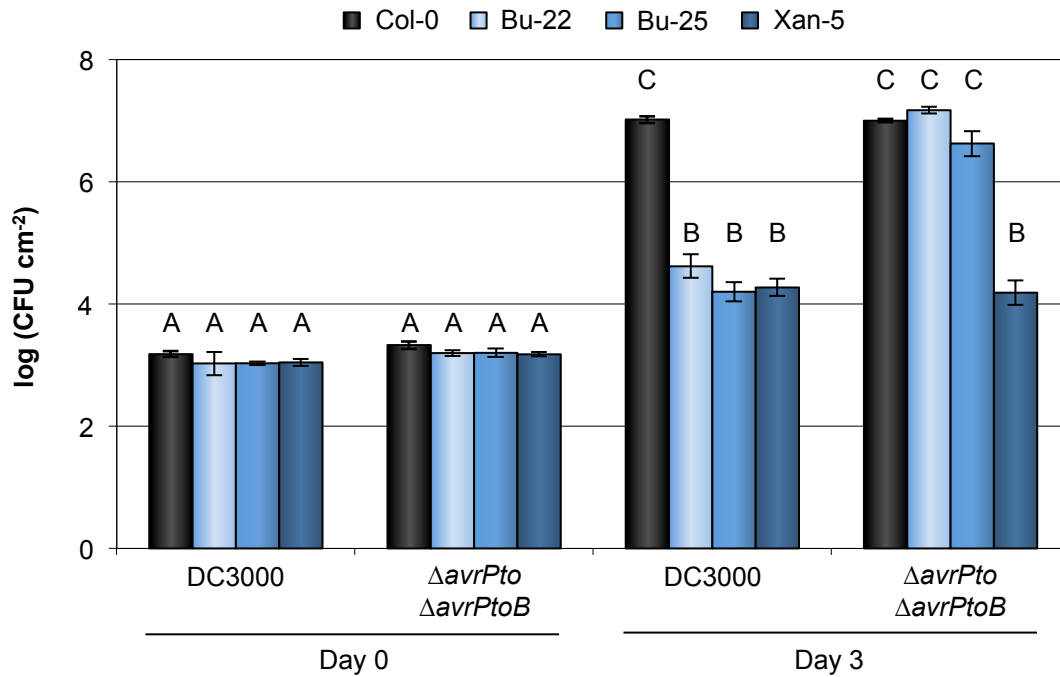

(b)

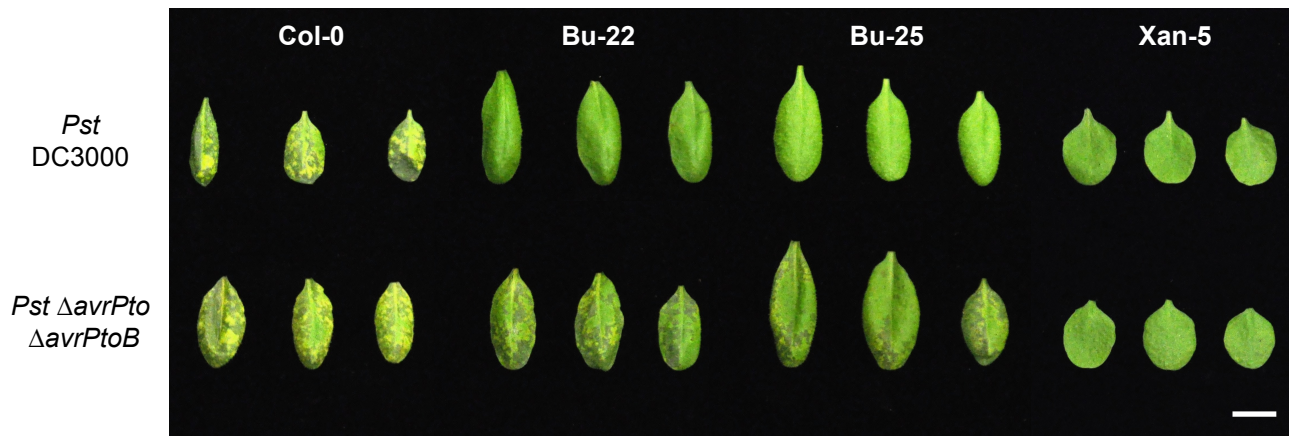

**Fig. S13.** AvrPto or AvrPtoB recognition mediates resistance to *Pseudomonas syringae* pv. *tomato* (*Pst*) DC3000 in Bu-22 and Bu-25 Arabidopsis accessions.

(a) *In planta* bacterial growth in *Pst*-resistant accessions after infiltration with *Pst* DC3000 and *Pst*  $\Delta\text{avrPto}\Delta\text{avrPtoB}$  at an inoculum of  $10^6$  CFU ml<sup>-1</sup>. Error bars show the standard error of 3 and 6 biological samples for days 0 and 3, respectively. Letters above each bar indicate similar groups as determined with a Tukey HSD test ( $P < 0.05$ ). Notice that the absence of AvrPto and/or AvrPtoB allows *Pst* DC3000 to multiply to high titers in Bu-22 and Bu-25 accessions.

(b) Disease symptoms 3 days after inoculation with *Pst* DC3000 and *Pst*  $\Delta\text{avrPto}\Delta\text{avrPtoB}$  at an inoculum of  $10^6$  CFU ml<sup>-1</sup>. Image was composed from accessions' individual images from a single experiment. Length of white bar represents 1 cm.

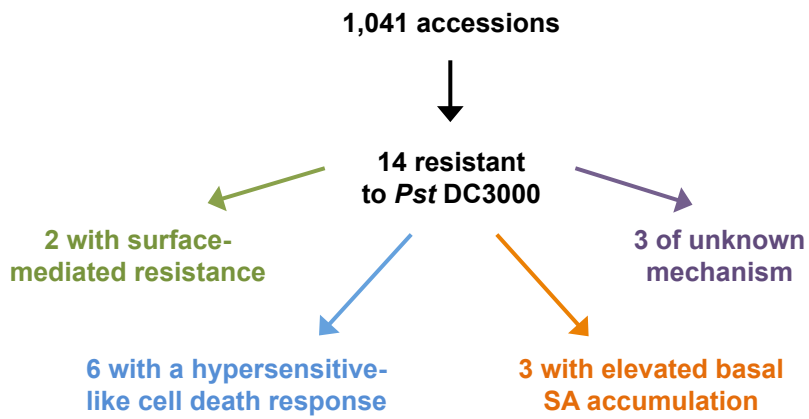

**Fig. S14.** Mechanisms of resistance against *Pseudomonas syringae* pv. *tomato* (*Pst*) DC3000 identified in *Arabidopsis thaliana* accessions.

Mechanisms of resistance are color-coded as they were throughout the manuscript. Abbreviation: SA = salicylic acid.
