# Supplementary material
Source: PubMed Central journal article supplement (PMC5423860)
Supplement: NIHMS852330-supplement-Supp_FigS4.pdf [file NIHMS852330-supplement-Supp_FigS4.pdf]

***New Phytologist* Supporting Information File 2**

Article title: **Diverse mechanisms of resistance to *Pseudomonas syringae* in a thousand natural accessions of *Arabidopsis thaliana***

Authors: André C. Velásquez, Matthew Oney, Bethany Huot, Shu Xu and Sheng Yang He

Article acceptance date: 7 February 2017

The following Supporting Information is available for this article:

**Fig. S4.** Several *Arabidopsis* accessions are resistant to *Pseudomonas syringae* pv. *tomato* (*Pst*) DC3000 infection.

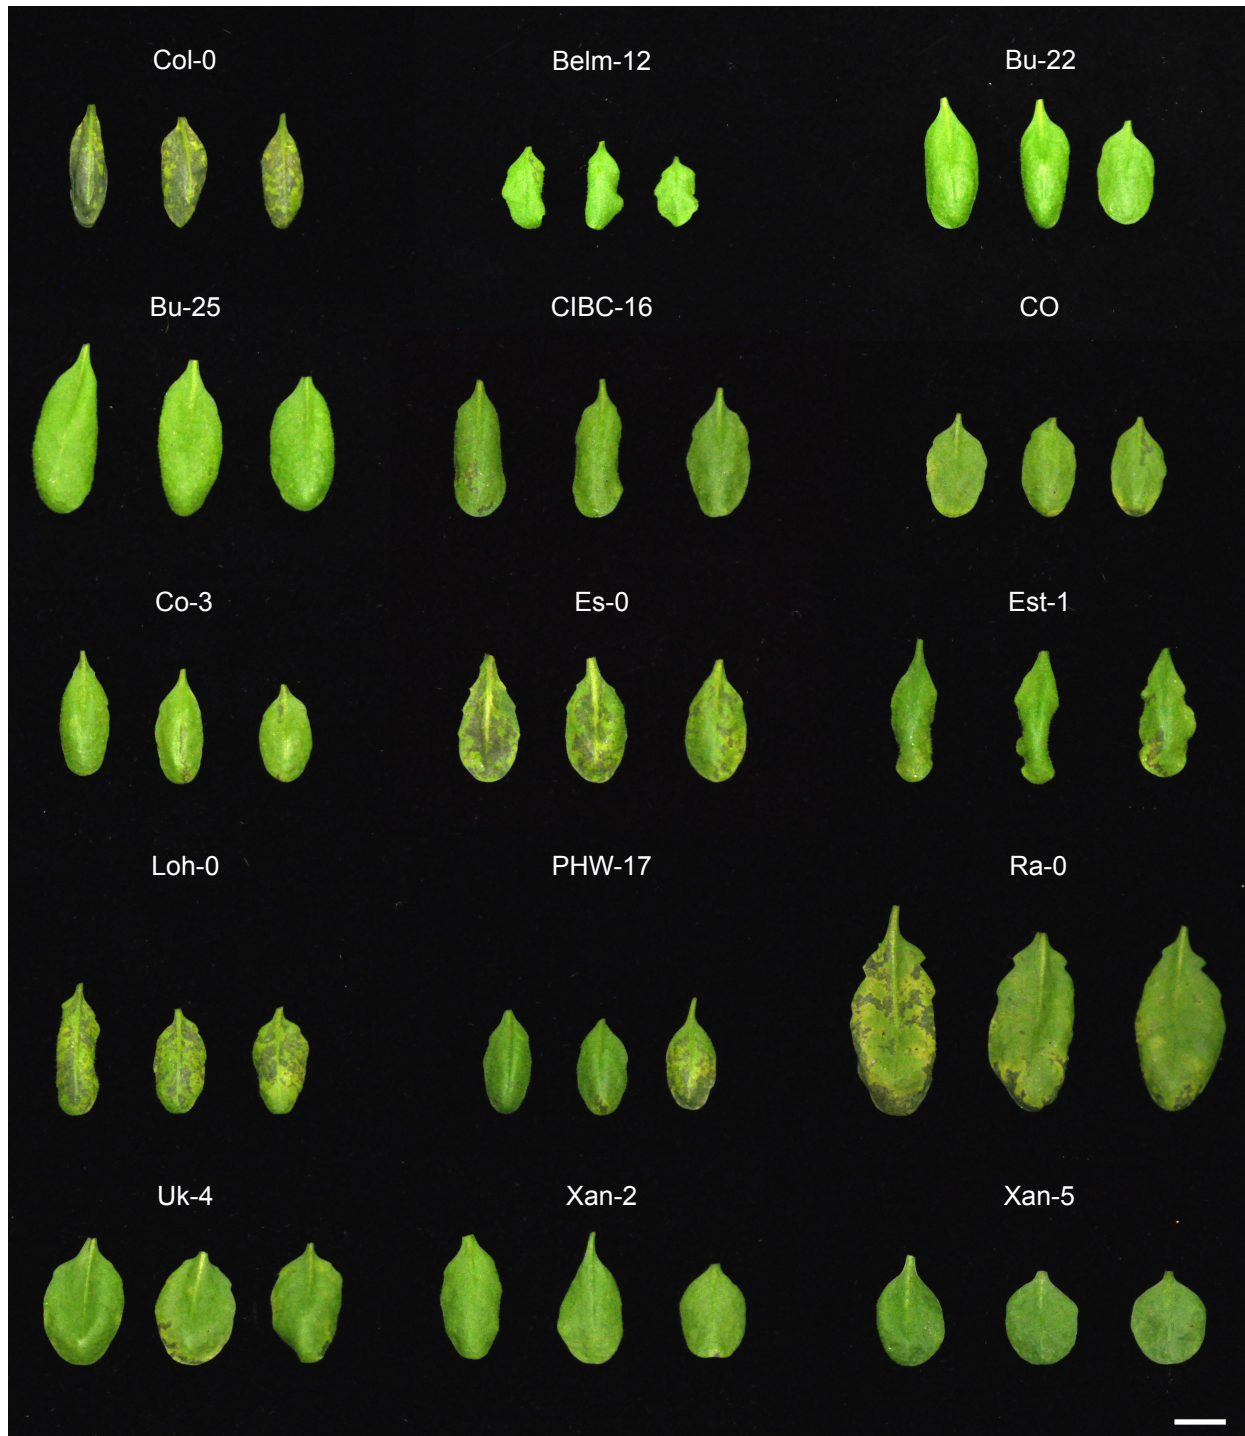

**Fig. S4.** Several *Arabidopsis* accessions are resistant to *Pseudomonas syringae* pv. *tomato* (*Pst*) DC3000 infection.

Bacterial symptoms three days after syringe-inoculation with *Pst* DC3000 at an inoculum of  $10^5$  CFU ml<sup>-1</sup> for *Arabidopsis* resistant accessions. No resistance is observed for Loh-0 and Es-0 accessions since these accessions only exhibit surface-mediated resistance. White bar length is equal to 1 cm. Image was composed from accessions' individual images from a single experiment.
