# Supplementary material
Source: PubMed Central journal article supplement (PMC5423860)
Supplement: NIHMS852330-supplement-Supp_TableS1-8_MethodsS1-3_NotesS1.pdf [file NIHMS852330-supplement-Supp_TableS1-8_MethodsS1-3_NotesS1.pdf]

## ***New Phytologist* Supporting Information File 6**

Article title: **Diverse mechanisms of resistance to *Pseudomonas syringae* in a thousand natural accessions of *Arabidopsis thaliana***

Authors: André C. Velásquez, Matthew Oney, Bethany Huot, Shu Xu and Sheng Yang He

Article acceptance date: 7 February 2017

The following Supporting Information is available for this article:

**Table S1.** Strains used in this study.

**Table S2.** Primers used in this study.

**Table S3.** *Arabidopsis thaliana* accessions evaluated for resistance to *Pseudomonas syringae* pv. *tomato* (*Pst*) DC3000.

**Table S4.**  $\chi^2$  goodness-of-fit test between the observed and expected segregation for the resistance to *Pseudomonas syringae* pv. *tomato* DC3000 in F<sub>2</sub> populations derived from crosses between resistant and susceptible accessions.

**Table S5.** List of *Pseudomonas syringae* pv. *tomato* DC3000 effectors and the effector gene cluster to which they belong.

**Table S6.** Search for the effector responsible for the accelerated cell death response in *Pseudomonas syringae* pv. *tomato* (*Pst*) DC3000-resistant accessions.

**Table S7.** HopAM1 may be responsible for the accelerated cell death observed in accession Xan-5.

**Table S8.** *Arabidopsis* accessions and the mechanism of resistance against *Pseudomonas syringae* pv. *tomato* identified in this study.

**Methods S1.** Crosses between *Arabidopsis* accessions.

**Methods S2.** Next-generation sequencing and SHOREmap mapping of resistance loci.

**Methods S3.** Statistical analyses.

**Notes S1.** References.

## SUPPORTING INFORMATION TABLES

**Table S1.** Strains used in this study.

| Name                                                                 | Comments                                                                                                                                                                                                                                                                                                                                                                                                                                                                                                                                                                                                                                                   | Reference                             |
|----------------------------------------------------------------------|------------------------------------------------------------------------------------------------------------------------------------------------------------------------------------------------------------------------------------------------------------------------------------------------------------------------------------------------------------------------------------------------------------------------------------------------------------------------------------------------------------------------------------------------------------------------------------------------------------------------------------------------------------|---------------------------------------|
| <i>E. coli</i> DH5 $\alpha$ pUCP19:: <i>avrRpt2</i>                  | <i>E. coli</i> strain carrying pUCP19:: <i>avrRpt2</i> , which is expressed from its endogenous promoter.                                                                                                                                                                                                                                                                                                                                                                                                                                                                                                                                                  | Zwiesler-Vollick <i>et al.</i> (2002) |
| <i>E. coli</i> S17-1<br>pK18mobsacB:: $\Delta$ <i>hopAM1-1</i>       | <i>E. coli</i> strain carrying sucrose-counter-selection plasmid pK18mobsacB with the <i>hopAM1-1</i> deletion construct.                                                                                                                                                                                                                                                                                                                                                                                                                                                                                                                                  | Cunnac <i>et al.</i> (2011)           |
| <i>Pseudomonas syringae</i> pv.<br><i>tomato</i> DC3000              | Rifampicin-resistant derivative from <i>Pst</i> strain DC52.                                                                                                                                                                                                                                                                                                                                                                                                                                                                                                                                                                                               |                                       |
| <i>Pst</i> DC3000<br>pDSK600:: <i>avrPphB</i>                        | <i>Pst</i> DC3000 expressing <i>avrPphB</i> effector from plasmid pPPY3031 (pDSK600:: <i>avrPphB</i> ). <i>AvrPphB</i> is expressed under the control of a triple <i>lacUV5</i> promoter.                                                                                                                                                                                                                                                                                                                                                                                                                                                                  | Puri <i>et al.</i> (1997)             |
| <i>Pseudomonas syringae</i> pv.<br><i>tomato</i> DC3000 $\Delta$ 28E | CUCPB5585. <i>Pst</i> DC3000 strain with 28 of its effectors deleted ( <i>hopK1</i> , <i>hopY1</i> , <i>hopU1</i> , <i>hopF2</i> , <i>hopH1</i> , <i>hopC1</i> , <i>hopD1</i> , <i>hopQ1-1</i> , <i>hopR1</i> , <i>hopAM1-1</i> , <i>hopN1</i> , <i>hopAA1-1</i> , <i>hopM1</i> , <i>avrE</i> , <i>hopB1</i> , <i>hopAF1</i> , <i>avrPtoB</i> , <i>avrPto</i> , <i>hopE1</i> , <i>hopAA1-2</i> , <i>hopV1</i> , <i>hopAO1</i> , <i>hopG1</i> , <i>hopI1</i> , <i>hopA1</i> , <i>hopAM1-2</i> , <i>hopX1</i> , <i>hopO1-1</i> , and <i>hopT1-1</i> ). Genes <i>hopAM1-1</i> and <i>hopAM1-2</i> have identical sequences and as such are only counted once. | Cunnac <i>et al.</i> (2011)           |
| <i>Pst</i> DC3000 $\Delta$ 28E<br>pBBR1MCS-2-GW:: <i>hopAM1-HA</i>   | <i>Pst</i> DC3000 strain with 28 of its effectors deleted and expressing <i>hopAM1</i> from its endogenous promoter. Effector carries a C-terminal HA tag.                                                                                                                                                                                                                                                                                                                                                                                                                                                                                                 | Xin <i>et al.</i> (2016)              |

| Name                                                                                 | Comments                                                                                                                                                                    | Reference                |
|--------------------------------------------------------------------------------------|-----------------------------------------------------------------------------------------------------------------------------------------------------------------------------|--------------------------|
| <i>Pst</i> DC3000 $\Delta$ 28E<br>pBBR1MCS-2-GW:: <i>hopK1</i> -HA                   | <i>Pst</i> DC3000 strain with 28 of its effectors deleted and expressing <i>hopK1</i> from its endogenous promoter. Effector carries a C-terminal HA tag.                   | Xin <i>et al.</i> (2016) |
| <i>Pst</i> DC3000 $\Delta$ 28E<br>pBBR1MCS-2-GW:: <i>hopY1</i> -HA                   | <i>Pst</i> DC3000 strain with 28 of its effectors deleted and expressing <i>hopY1</i> from its endogenous promoter. Effector carries a C-terminal HA tag.                   | Xin <i>et al.</i> (2016) |
| <i>Pst</i> DC3000 $\Delta$ 28E<br>pBBR1MCS-2-GW:: <i>hrpK1</i> -<br><i>hopB1</i> -HA | <i>Pst</i> DC3000 strain with 28 of its effectors deleted and expressing <i>hrpK1-hopB1</i> as an operon from their endogenous promoter. HopB1 carries a C-terminal HA tag. | Xin <i>et al.</i> (2016) |
| <i>Pst</i> DC3000 $\Delta$ 28E<br>pBBR1MCS-2-GW:: <i>hopAF1</i> -<br>HA              | <i>Pst</i> DC3000 strain with 28 of its effectors deleted and expressing <i>hopAF1</i> from its endogenous promoter. Effector carries a C-terminal HA tag.                  | Xin <i>et al.</i> (2016) |
| <i>Pst</i> DC3000 $\Delta$ 28E<br>pBBR1MCS-2-GW:: <i>hopE1</i> -HA                   | <i>Pst</i> DC3000 strain with 28 of its effectors deleted and expressing <i>hopE1</i> from its endogenous promoter. Effector carries a C-terminal HA tag.                   | Xin <i>et al.</i> (2016) |
| <i>Pst</i> DC3000 $\Delta$ 28E<br>pBBR1MCS-2-GW:: <i>hopI1</i> -HA                   | <i>Pst</i> DC3000 strain with 28 of its effectors deleted and expressing <i>hopI1</i> from its endogenous promoter. Effector carries a C-terminal HA tag.                   | Xin <i>et al.</i> (2016) |
| <i>Pst</i> DC3000 $\Delta$ 28E<br>pBBR1MCS-2-GW:: <i>shcA</i> -<br><i>hopA1</i> -HA  | <i>Pst</i> DC3000 strain with 28 of its effectors deleted and expressing <i>shcA-hopA1</i> as an operon from their endogenous promoter. HopA1 carries a C-terminal HA tag.  | Xin <i>et al.</i> (2016) |

| Name                                                                                                              | Comments                                                                                                                                                                                                                                                                                                                                                                                                                                                                                                               | Reference                      |
|-------------------------------------------------------------------------------------------------------------------|------------------------------------------------------------------------------------------------------------------------------------------------------------------------------------------------------------------------------------------------------------------------------------------------------------------------------------------------------------------------------------------------------------------------------------------------------------------------------------------------------------------------|--------------------------------|
| <i>Pst</i> DC3000 $\Delta$ 28E<br>pUCP19:: <i>avrRpt2</i>                                                         | <i>Pst</i> DC3000 strain with 28 of its effectors deleted and expressing <i>avrRpt2</i> from its endogenous promoter. Use 400 $\mu$ g ml <sup>-1</sup> of ampicillin for plasmid selection in solid media.                                                                                                                                                                                                                                                                                                             | This study                     |
| <i>Pseudomonas syringae</i> pv.<br><i>tomato</i> DC3000 $\Delta$ <i>avrPto</i><br>$\Delta$ <i>avrPtoB</i>         | <i>Pst</i> DC3000 strain that has both <i>avrPto</i> and <i>avrPtoB</i> genes deleted.                                                                                                                                                                                                                                                                                                                                                                                                                                 | Lin & Martin<br>(2005)         |
| <i>Pseudomonas syringae</i> pv.<br><i>tomato</i> DC3000 $\Delta$ <i>avrPto</i>                                    | <i>Pst</i> DC3000 strain that has the <i>avrPto</i> effector gene deleted.                                                                                                                                                                                                                                                                                                                                                                                                                                             | Ronald <i>et al.</i><br>(1992) |
| <i>Pseudomonas syringae</i> pv.<br><i>tomato</i> DC3000 $\Delta$ <i>avrPtoB</i>                                   | <i>Pst</i> DC3000 strain that has the <i>avrPtoB</i> ( <i>hopAB2</i> ) effector gene deleted.                                                                                                                                                                                                                                                                                                                                                                                                                          | From the Collmer<br>lab        |
| <i>Pseudomonas syringae</i> pv.<br><i>tomato</i> DC3000 $\Delta$ <i>CEL</i>                                       | CUCPB5115. <i>Pst</i> DC3000 strain with the Conserved effector locus ( <i>CEL</i> ) deleted. Four effectors ( <i>hopN1</i> , <i>hopAA1-1</i> , <i>hopM1</i> , and <i>avrE</i> ) are encompassed in this locus.                                                                                                                                                                                                                                                                                                        | Alfano <i>et al.</i> (2000)    |
| <i>Pseudomonas syringae</i> pv.<br><i>tomato</i> DC3000 $\Delta$ I $\Delta$ II $\Delta$ IV $\Delta$ IX $\Delta$ X | CUCPB5459. <i>Pst</i> DC3000 strain with five clusters of effectors deleted; a total of 15 effectors are deleted. Cluster I encompasses <i>hopU1</i> and <i>hopF2</i> effectors; cluster II encompasses <i>hopH1</i> and <i>hopC1</i> ; cluster IV encompasses <i>hopD1</i> , <i>hopQ1-1</i> , and <i>hopR1</i> ; cluster IX encompasses <i>hopAA1-2</i> , <i>hopV1</i> , <i>hopAO1</i> , and <i>hopG1</i> ; and cluster X encompasses <i>hopAM1-2</i> , <i>hopX1</i> , <i>hopO1-1</i> , and <i>hopT1-1</i> effectors. | Kvitko <i>et al.</i> (2009)    |

| Name                                                                          | Comments                                                                                                                                                                                                                     | Reference                     |
|-------------------------------------------------------------------------------|------------------------------------------------------------------------------------------------------------------------------------------------------------------------------------------------------------------------------|-------------------------------|
| <i>Pseudomonas syringae</i> pv. <i>tomato</i> DC3001                          | <i>Pst</i> DC3001 is a strain with a spontaneous deletion of an approximate 10-kb fragment that includes <i>hopAM1-2</i> from plasmid A. Strain obtained from Dr. Roger Innes.                                               | Landgraf <i>et al.</i> (2006) |
| <i>Pseudomonas syringae</i> pv. <i>tomato</i> DC3001 $\Delta$ <i>hopAM1-1</i> | <i>Pst</i> strain that has both <i>hopAM1-1</i> and <i>hopAM1-2</i> genes deleted. <i>Pst</i> DC3001 is a strain with a spontaneous deletion of an approximate 10-kb fragment which includes <i>hopAM1-2</i> from plasmid A. | This study                    |
| <i>Pseudomonas syringae</i> pv. <i>tomato</i> DC3000 $\Delta$ <i>hrcC</i>     | CUCPB5112. Non-pathogenic <i>Pst</i> DC3000 strain without a functional type III secretion system.                                                                                                                           | Wei <i>et al.</i> (2000)      |
| <i>Pseudomonas cannabina</i> pv. <i>alisalensis</i> ES4326R                   | Rifampicin-resistant <i>Pcal</i> ES4326 strain (a.k.a. <i>Pseudomonas syringae</i> pv. <i>maculicola</i> ES4326)                                                                                                             |                               |

**Table S2.** Primers used in this study.

| Name      | Sequence 5' → 3'             | Comments                                                                                                                                                                                                                                                         | Reference                      |
|-----------|------------------------------|------------------------------------------------------------------------------------------------------------------------------------------------------------------------------------------------------------------------------------------------------------------|--------------------------------|
| nga139-F  | AGGGTTTCGTTTCACT<br>ATCCAG   | Microsatellite marker; (AG) <sub>29</sub> on <i>A. thaliana</i> chromosome IV.                                                                                                                                                                                   | Berendzen <i>et al.</i> (2005) |
| nga139-R  | TGAGAGCTACCAGAT<br>CCGATG    | Microsatellite marker; (AG) <sub>29</sub> on <i>A. thaliana</i> chromosome IV. Aligns in the reverse orientation.                                                                                                                                                | Berendzen <i>et al.</i> (2005) |
| nga151a-F | ATCTCATACTGACCCA<br>TATGTTCC | Microsatellite marker; (CT) <sub>31</sub> on <i>A. thaliana</i> chromosome V (29.62 cM).                                                                                                                                                                         | Berendzen <i>et al.</i> (2005) |
| nga151a-R | ATTGTACAGTCTAAAA<br>GCGAGAG  | Microsatellite marker; (CT) <sub>31</sub> on <i>A. thaliana</i> chromosome V (29.62 cM). Aligns in the reverse orientation.                                                                                                                                      | Berendzen <i>et al.</i> (2005) |
| nga172-F  | AGCTGCTTCCTTATAG<br>CGTCC    | Microsatellite marker; (GA) <sub>29</sub> on <i>A. thaliana</i> chromosome III (6.91 cM).                                                                                                                                                                        | Berendzen <i>et al.</i> (2005) |
| nga172-R  | (C)CATCCGAATGCCA<br>TTGTTC   | Microsatellite marker; (GA) <sub>29</sub> on <i>A. thaliana</i> chromosome III (6.91 cM). Aligns in the reverse orientation.                                                                                                                                     | Berendzen <i>et al.</i> (2005) |
| P1        | CTGGAGAGCCCTTAA<br>AAACAG    | Anneals to 1624 - 1644 bp of pDC3000A. Use simultaneously in one PCR reaction with P5 and T1. Expected amplicon size is 538 bp for <i>Pst</i> DC3000 (T1 + P5) or 269 bp for <i>Pst</i> DC3001 (P1 + P5).                                                        | Landgraf <i>et al.</i> (2006)  |
| P2615     | GTCAACGGCCAGGAG<br>CCCTATA   | Anneals 1114586 - 1114607 bp of <i>Pst</i> DC3000 (and to <b>more than 30 other sites</b> in the genome of <i>Pst</i> DC3000). Expected amplicon size is 2955 bp for <i>Pst</i> DC3000 or 2133 bp for <i>Pst</i> DC3001 ( $\Delta$ <i>hopAM1-2</i> ) with P2616. | Cunnac <i>et al.</i> (2011)    |

| Name  | Sequence 5' → 3'         | Comments                                                                      | Reference                     |
|-------|--------------------------|-------------------------------------------------------------------------------|-------------------------------|
| P2616 | CCGCAAGCGTTCAAG<br>GGTCT | Anneals 1117521 - 1117540 bp of <i>Pst</i> DC3000 in the reverse orientation. | Cunnac <i>et al.</i> (2011)   |
| P5    | GTGGCGCAGCACCGT<br>CAAG  | Anneals to 11272 - 11290 bp of pDC3000A in the reverse orientation.           | Landgraf <i>et al.</i> (2006) |
| T1    | GTAGATCACCGAGAG<br>ATTGC | Anneals to 10753 - 10772 bp of pDC3000A.                                      | Landgraf <i>et al.</i> (2006) |



**Table S3.** *Arabidopsis thaliana* accessions evaluated for resistance to *Pseudomonas syringae* pv. *tomato* (*Pst*) DC3000.

| Accession | ABRC stock number or reference |
|-----------|--------------------------------|
| 9354      | CS22468                        |
| 9481      | CS22458                        |
| 9481A     | CS22459                        |
| 9481B     | CS22460                        |
| 9481C     | CS22461                        |
| 9481D     | CS22462                        |
| Abd-0     | CS932                          |
| Abil-1    | CS28920                        |
| Abil-2    | CS28921                        |
| Ag-0      | CS901                          |
| Ak-1      | CS938                          |
| Alc-0     | CS1656                         |
| Alst-1    | CS22550                        |
| Amel-1    | CS22526                        |
| Amel-2    | CS22527                        |
| An-1      | CS22626                        |
| An-2      | CS946                          |
| And-1     | CS28938                        |
| And-2     | CS28939                        |
| And-3     | CS28940                        |
| And-4     | CS28941                        |
| Ang-0     | CS948                          |
| Ang-1     | CS950                          |
| Ange-1    | CS22519                        |
| Anholt-1  | CS22313                        |
| Anholt-2  | CS22314                        |
| Anholt-3  | CS22315                        |
| Anholt-4  | CS22316                        |
| Anholt-5  | CS22317                        |
| Anholt-6  | CS22318                        |
| Anholt-7  | CS22319                        |
| Anholt-8  | CS22320                        |
| Anholt-9  | CS22321                        |
| Anholt-10 | CS22322                        |

| <b>Accession</b> | <b>ABRC stock number<br/>or reference</b> |
|------------------|-------------------------------------------|
| Anholt-11        | CS22323                                   |
| Anholt-12        | CS22324                                   |
| Anholt-13        | CS22325                                   |
| Anholt-14        | CS22326                                   |
| Anholt-15        | CS22327                                   |
| Anholt-16        | CS22328                                   |
| Anholt-17        | CS22329                                   |
| Anholt-18        | CS22330                                   |
| Anholt-19        | CS22331                                   |
| Anholt-20        | CS22332                                   |
| Anholt-21        | CS22333                                   |
| Anholt-22        | CS22334                                   |
| Anholt-23        | CS22335                                   |
| Anholt-24        | CS22336                                   |
| Anholt-25        | CS22337                                   |
| Anholt-26        | CS22338                                   |
| Anholt-27        | CS22339                                   |
| Anholt-28        | CS22340                                   |
| Ann-1            | CS22520                                   |
| Appt-1           | CS22528                                   |
| Arby-1           | CS22547                                   |
| Ayu-Dag-1        | CS22815                                   |
| Ayu-Dag-2        | CS22816                                   |
| Ayu-Dag-3        | CS22817                                   |
| Ayu-Dag-4        | CS22818                                   |
| Ayu-Dag-5        | CS22819                                   |
| Ayu-Dag-6        | CS22820                                   |
| Ayu-Dag-8        | CS22821                                   |
| Ayu-Dag-9        | CS22822                                   |
| Ba-1             | CS952                                     |
| Baa-1            | CS22529                                   |
| Bak-1            | CS22755                                   |
| Bak-2            | CS22756                                   |
| Bak-3            | CS22757                                   |
| Bak-4            | CS22758                                   |
| Bak-5            | CS22759                                   |
| Bak-7            | CS22760                                   |
| Bak-8            | CS22761                                   |
| Bak-9            | CS22762                                   |

| Accession      | ABRC stock number<br>or reference |
|----------------|-----------------------------------|
| Bay-0          | CS22633                           |
| Bch-1          | CS956                             |
| Bch-3          | CS958                             |
| Bch-4          | CS960                             |
| Bd-0           | CS962                             |
| Be-0           | CS964                             |
| Be-1           | CS966                             |
| <b>Belm-12</b> | Dittmar <i>et al.</i> (2014)      |
| Benk-1         | CS22530                           |
| Benk-2         | CS22531                           |
| Ber            | CS3109                            |
| Berkeley       | CS8068                            |
| BG1            | CS22341                           |
| BG2            | CS22342                           |
| BG3            | CS22343                           |
| BG4            | CS22344                           |
| BG5            | CS22345                           |
| BG6            | CS22346                           |
| BG7            | CS22347                           |
| BG9            | CS22349                           |
| Bil-5          | CS22578                           |
| Bil-7          | CS22579                           |
| Bl-1           | CS968                             |
| Bla-1          | CS970                             |
| Bla-2          | CS6194                            |
| Bla-3          | CS974                             |
| Bla-4          | CS976                             |
| Bla-5          | CS978                             |
| Bla-6          | CS980                             |
| Bla-10         | CS982                             |
| Bla-11         | CS984                             |
| Bla-12         | CS986                             |
| Bla-14         | CS988                             |
| Blh-1          | CS1030                            |
| Blh-2          | CS1054                            |
| Bm-0           | CS1666                            |
| Bn-0           | CS990                             |
| Boot-1         | CS22551                           |
| Bor-1          | CS22590                           |

| Accession     | ABRC stock number<br>or reference |
|---------------|-----------------------------------|
| Bor-4         | CS22591                           |
| Br-0          | CS994                             |
| Bs-1          | CS996                             |
| Bs-2          | CS998                             |
| Bs-5          | CS1000                            |
| Bsch-0        | CS1002                            |
| Bsch-2        | CS1004                            |
| Bu-0          | CS1006                            |
| Bu-2          | CS1008                            |
| Bu-3          | CS1010                            |
| Bu-4          | CS1012                            |
| Bu-5          | CS1014                            |
| Bu-6          | CS1016                            |
| Bu-7          | CS1018                            |
| Bu-8          | CS1020                            |
| Bu-9          | CS1022                            |
| Bu-11         | CS1024                            |
| Bu-13         | CS1026                            |
| Bu-14         | CS1032                            |
| Bu-15         | CS1034                            |
| Bu-17         | CS1036                            |
| Bu-18         | CS1038                            |
| Bu-19         | CS1040                            |
| Bu-20         | CS1042                            |
| Bu-21         | CS1044                            |
| <b>Bu-22</b>  | <b>CS1046</b>                     |
| Bu-23         | CS1048                            |
| Bu-24         | CS1050                            |
| <b>Bu-25</b>  | <b>CS1052</b>                     |
| Buckhorn Pass | CS8067                            |
| Bur-0         | CS22656                           |
| C24           | CS22620                           |
| Ca-0          | CS1060                            |
| Cal-0         | CS1062                            |
| Cala-1        | CS22783                           |
| Cala-2        | CS22784                           |
| Cala-3        | CS22785                           |
| Cala-4        | CS22786                           |
| Cala-5        | CS22787                           |

| <b>Accession</b> | <b>ABRC stock number<br/>or reference</b> |
|------------------|-------------------------------------------|
| Cala-6           | CS22788                                   |
| Cala-7           | CS22789                                   |
| Cala-8           | CS22790                                   |
| Can-0            | CS1064                                    |
| Cant-1           | CS28854                                   |
| Cant-2           | CS28855                                   |
| Cant-3           | CS28856                                   |
| Cant-4           | CS28857                                   |
| Cant-5           | CS28858                                   |
| Cant-6           | CS28859                                   |
| Cant-7           | CS28860                                   |
| Cant-8           | CS28861                                   |
| Cen-0            | CS1066                                    |
| Cerv-1           | CS22523                                   |
| Cha-0            | CS1068                                    |
| Cha-1            | CS1070                                    |
| Chat-1           | CS22521                                   |
| Chi-0            | CS1072                                    |
| Chi-1            | CS1074                                    |
| Chi-2            | CS1076                                    |
| CIBC-1           | CS22220                                   |
| CIBC-2           | CS22221                                   |
| CIBC-4           | CS22223                                   |
| CIBC-5           | CS22602                                   |
| CIBC-6           | CS22225                                   |
| CIBC-7           | CS22226                                   |
| CIBC-10          | CS22229                                   |
| CIBC-11          | CS22230                                   |
| CIBC-12          | CS22231                                   |
| CIBC-13          | CS22232                                   |
| CIBC-14          | CS22233                                   |
| CIBC-15          | CS22234                                   |
| <b>CIBC-16</b>   | <b>CS22235</b>                            |
| CIBC-17          | CS22603                                   |
| CIBC-18          | CS22237                                   |
| CIBC-19          | CS22238                                   |
| CIBC-20          | CS22239                                   |
| Cit-0            | CS1080                                    |
| CI-0             | CS1082                                    |

| Accession                 | ABRC stock number<br>or reference |
|---------------------------|-----------------------------------|
| Cnt-1                     | CS1635                            |
| <b>Co</b>                 | <b>CS3180</b>                     |
| Co-1                      | CS1084                            |
| Co-2                      | CS1086                            |
| <b>Co-3</b>               | <b>CS1088</b>                     |
| Co-4                      | CS1090                            |
| Col-0                     | CS22625                           |
| Col-1                     | CS3176                            |
| Col-3                     | CS908                             |
| Col-4                     | CS933                             |
| Col-5(gl1)                | CS1644                            |
| Col-6(gl1)                | CS8155                            |
| Col-7                     | CS3731                            |
| Col(gl1)                  | CS3879                            |
| Cold Spring Harbor Lab-1  | CS22419                           |
| Cold Spring Harbor Lab-2  | CS22420                           |
| Cold Spring Harbor Lab-3  | CS22421                           |
| Cold Spring Harbor Lab-4  | CS22422                           |
| Cold Spring Harbor Lab-5  | CS22423                           |
| Cold Spring Harbor Lab-6  | CS22424                           |
| Cold Spring Harbor Lab-7  | CS22425                           |
| Cold Spring Harbor Lab-8  | CS22426                           |
| Cold Spring Harbor Lab-9  | CS22427                           |
| Cold Spring Harbor Lab-10 | CS22428                           |
| Cold Spring Harbor Lab-11 | CS22429                           |
| Cold Spring Harbor Lab-12 | CS22430                           |
| Cold Spring Harbor Lab-13 | CS22431                           |
| Cold Spring Harbor Lab-14 | CS22432                           |
| Cold Spring Harbor Lab-15 | CS22433                           |
| Cold Spring Harbor Lab-17 | CS22434                           |
| Com-1                     | CS22522                           |
| Ct-1                      | CS22639                           |
| Cvi-0                     | CS22614                           |
| Cvi-1                     | CS8580                            |
| Da-0                      | CS1098                            |
| Da(1)-12                  | CS917                             |
| Db-0                      | CS1100                            |
| Db-1                      | CS1102                            |
| Db-2                      | CS1104                            |

| <b>Accession</b> | <b>ABRC stock number<br/>or reference</b> |
|------------------|-------------------------------------------|
| Del-1            | CS28885                                   |
| Del-4            | CS28886                                   |
| Del-6            | CS28887                                   |
| Del-8            | CS28912                                   |
| Del-8            | CS28888                                   |
| Del-9            | CS28889                                   |
| Del-10           | CS28890                                   |
| Del-11           | CS28891                                   |
| Del-12           | CS28892                                   |
| Di-0             | CS1106                                    |
| Di-1             | CS1108                                    |
| Di-2             | CS1110                                    |
| Di-G             | CS910                                     |
| Di-M             | CS919                                     |
| Do-0             | CS1112                                    |
| Dog-4            | CS22698                                   |
| Dog-5            | CS22699                                   |
| Dog-6            | CS22700                                   |
| Dog-7            | CS22701                                   |
| Dog-8            | CS22702                                   |
| Dr-0             | CS1114                                    |
| Dra-0            | CS1116                                    |
| Dra-1            | CS1118                                    |
| Dra-2            | CS1120                                    |
| Durh-1           | CS22552                                   |
| Durh-2           | CS22553                                   |
| Dzi-1            | CS28980                                   |
| Ede-1            | CS22532                                   |
| Eden-1           | CS22572                                   |
| Eden-2           | CS22573                                   |
| Edi-0            | CS22657                                   |
| Edinburgh-1      | CS28958                                   |
| Edinburgh-2      | CS28959                                   |
| Edinburgh-3      | CS28960                                   |
| Edinburgh-4      | CS28961                                   |
| Edinburgh-5      | CS28962                                   |
| Edinburgh-6      | CS28963                                   |
| Edinburgh-7      | CS28964                                   |
| Edinburgh-8      | CS28965                                   |

| Accession    | ABRC stock number<br>or reference |
|--------------|-----------------------------------|
| Ei-2         | CS22616                           |
| Ei-4         | CS1126                            |
| Ei-5         | CS1128                            |
| Ei-6         | CS1130                            |
| Eil-0        | CS1132                            |
| EI-0         | CS1134                            |
| Ema-1        | CS1637                            |
| En-1         | CS1136                            |
| En-2         | CS1138                            |
| En-D         | CS920                             |
| En-T         | CS6176                            |
| ENF          | CS8141                            |
| Ep-0         | CS1140                            |
| ER           | CS3177                            |
| Er-0         | CS1142                            |
| Eri-1        | CS22548                           |
| <b>Es-0</b>  | <b>CS1144</b>                     |
| Est          | CS911                             |
| Est-0        | CS1148                            |
| <b>Est-1</b> | <b>CS22629</b>                    |
| Et-0         | CS1152                            |
| Fab-2        | CS22576                           |
| Fab-4        | CS22577                           |
| Fe-1         | CS1154                            |
| Fei-0        | CS22645                           |
| Fi-0         | CS1156                            |
| Fi-1         | CS1158                            |
| FI-1         | CS1160                            |
| FI-1         | CS1160                            |
| FM3          | CS22385                           |
| FM8          | CS22389                           |
| FM9          | CS22390                           |
| FM10         | CS22391                           |
| FM11         | CS22392                           |
| FM12         | CS22393                           |
| FM13         | CS22394                           |
| FM14         | CS22395                           |
| FM15         | CS22396                           |
| FM18         | CS22398                           |



| <b>Accession</b> | <b>ABRC stock number<br/>or reference</b> |
|------------------|-------------------------------------------|
| FM19             | CS22399                                   |
| FM20             | CS22400                                   |
| Fr-2             | CS1168                                    |
| Fr-3             | CS1170                                    |
| Fr-4             | CS1172                                    |
| Fr-5             | CS1174                                    |
| Fr-6             | CS1176                                    |
| Fr-7             | CS1178                                    |
| Ga-0             | CS22634                                   |
| Ga-2             | CS1182                                    |
| Gd-1             | CS1184                                    |
| Ge-0             | CS1186                                    |
| Ge-1             | CS1188                                    |
| Ge-2             | CS1190                                    |
| Geg-14           | CS22763                                   |
| Gel-1            | CS22533                                   |
| Gie-0            | CS1192                                    |
| Gifu-2           | CS3963                                    |
| Gö-0             | CS1194                                    |
| Gö-2             | CS1196                                    |
| Goettingen-1     | CS22277                                   |
| Goettingen-2     | CS22278                                   |
| Goettingen-3     | CS22279                                   |
| Goettingen-4     | CS22280                                   |
| Goettingen-5     | CS22281                                   |
| Goettingen-6     | CS22282                                   |
| Goettingen-8     | CS22284                                   |
| Goettingen-9     | CS22285                                   |
| Goettingen-10    | CS22286                                   |
| Goettingen-11    | CS22287                                   |
| Goettingen-12    | CS22288                                   |
| Goettingen-13    | CS22289                                   |
| Goettingen-14    | CS22290                                   |
| Goettingen-15    | CS22291                                   |
| Goettingen-16    | CS22292                                   |
| Goettingen-17    | CS22293                                   |
| Goettingen-18    | CS22294                                   |
| Goettingen-19    | CS22295                                   |
| Goettingen-20    | CS22296                                   |

| <b>Accession</b> | <b>ABRC stock number<br/>or reference</b> |
|------------------|-------------------------------------------|
| Goettingen-21    | CS22297                                   |
| Goettingen-23    | CS22299                                   |
| Goettingen-24    | CS22300                                   |
| Goettingen-25    | CS22301                                   |
| Goettingen-26    | CS22302                                   |
| Goettingen-27    | CS22303                                   |
| Goettingen-28    | CS22304                                   |
| Goettingen-29    | CS22305                                   |
| Goettingen-30    | CS22306                                   |
| Goettingen-31    | CS22307                                   |
| Goettingen-32    | CS22308                                   |
| Goettingen-33    | CS22309                                   |
| Goettingen-34    | CS22310                                   |
| Goettingen-35    | CS22311                                   |
| Goettingen-36    | CS22312                                   |
| Gol-1            | CS28973                                   |
| Gol-2            | CS28974                                   |
| Gol-3            | CS28975                                   |
| Gol-5            | CS28976                                   |
| Gol-6            | CS28977                                   |
| Gol-7            | CS28978                                   |
| Gol-8            | CS28979                                   |
| Gor-7            | CS22608                                   |
| Got-22           | CS22609                                   |
| Gr-1             | CS1198                                    |
| Gr-2             | CS1200                                    |
| Gr-3             | CS1202                                    |
| Gr-4             | CS1204                                    |
| Gr-5             | CS1206                                    |
| Gr-6             | CS1208                                    |
| Gr3              | CS3179                                    |
| Gre-0            | CS1210                                    |
| Gu-0             | CS22617                                   |
| Gü-1             | CS1214                                    |
| Gy-0             | CS22631                                   |
| H55              | CS923                                     |
| Ha-0             | CS1218                                    |
| Harvard Square-1 | CS22351                                   |
| Harvard Square-7 | CS22353                                   |

| <b>Accession</b>  | <b>ABRC stock number<br/>or reference</b> |
|-------------------|-------------------------------------------|
| Harvard Square-10 | CS22354                                   |
| Harvard Square-11 | CS22355                                   |
| Harvard Square-12 | CS22356                                   |
| Harvard Square-17 | CS22359                                   |
| Hau-0             | CS1220                                    |
| Heem-1            | CS28942                                   |
| Heem-2            | CS28943                                   |
| Heem-3            | CS28944                                   |
| Heem-4            | CS28945                                   |
| Heem-6            | CS28946                                   |
| Heem-7            | CS28947                                   |
| Heem-8            | CS28948                                   |
| Heem-9            | CS28949                                   |
| Hey-1             | CS22534                                   |
| Hh-0              | CS1224                                    |
| Hi-0              | CS1226                                    |
| Hi-0              | CS1228                                    |
| Hi-2              | CS1230                                    |
| Hi-3              | CS1232                                    |
| Hn-0              | CS1234                                    |
| Hodja-Obi-Garm    | CS922                                     |
| HR-5              | CS22596                                   |
| HR-8              | CS22208                                   |
| HR-10             | CS22597                                   |
| HR-14             | CS22213                                   |
| HR-15             | CS22214                                   |
| HR-17             | CS22216                                   |
| Hs-0              | CS1236                                    |
| In-0              | CS1238                                    |
| Is-0              | CS1240                                    |
| Is-1              | CS1242                                    |
| Istisu-1          | CS22730                                   |
| Istisu-3          | CS22731                                   |
| Istisu-4          | CS22732                                   |
| Istisu-5          | CS22733                                   |
| Istisu-6          | CS22734                                   |
| Istisu-7          | CS22735                                   |
| Istisu-8          | CS22736                                   |
| Istisu-9          | CS22737                                   |

| <b>Accession</b> | <b>ABRC stock number<br/>or reference</b> |
|------------------|-------------------------------------------|
| Ita-0            | CS1244                                    |
| Jag-2            | CS-28901                                  |
| Jag-3            | CS28902                                   |
| Jag-4            | CS28903                                   |
| Jag-5            | CS28904                                   |
| Jag-6            | CS28905                                   |
| Jag-8            | CS28906                                   |
| Jag-9            | CS28907                                   |
| Jag-10           | CS28908                                   |
| Je-0             | CS1246                                    |
| Je54             | CS924                                     |
| Jedb-1           | CS22554                                   |
| Jl-1             | CS1248                                    |
| Jl-2             | CS1250                                    |
| Jl-3             | CS1252                                    |
| Jl-4             | CS1254                                    |
| Jl-5             | CS1256                                    |
| Jm-0             | CS1258                                    |
| Jm-1             | CS1260                                    |
| Jm-2             | CS1262                                    |
| Js-0             | CS1670                                    |
| Ka-0             | CS1266                                    |
| Kas-1            | CS903                                     |
| Kastel-1         | CS22807                                   |
| Kastel-2         | CS22808                                   |
| Kastel-3         | CS22809                                   |
| Kastel-4         | CS22810                                   |
| Kastel-5         | CS22811                                   |
| Kastel-6         | CS22812                                   |
| Kastel-7         | CS22813                                   |
| Kastel-8         | CS22814                                   |
| Kb-0             | CS1268                                    |
| Kelsterbach -1   | CS6038                                    |
| Kelsterbach -2   | CS6039                                    |
| Kelsterbach -3   | CS6040                                    |
| Kelsterbach -4   | CS6041                                    |
| KEN              | CS8142                                    |
| Kil-0            | CS1270                                    |
| Kin-0            | CS22654                                   |

| <b>Accession</b> | <b>ABRC stock number<br/>or reference</b> |
|------------------|-------------------------------------------|
| KI-0             | CS1274                                    |
| KI-1             | CS1276                                    |
| KI-2             | CS1278                                    |
| KI-3             | CS1280                                    |
| KI-4             | CS1282                                    |
| KI-5             | CS1284                                    |
| Kn-0             | CS1286                                    |
| Knox-1           | CS22401                                   |
| Knox-2           | CS22402                                   |
| Knox-3           | CS22403                                   |
| Knox-4           | CS22404                                   |
| Knox-5           | CS22405                                   |
| Knox-6           | CS22406                                   |
| Knox-7           | CS22407                                   |
| Knox-8           | CS22408                                   |
| Knox-9           | CS22409                                   |
| Knox-10          | CS22566                                   |
| Knox-11          | CS22411                                   |
| Knox-12          | CS22412                                   |
| Knox-13          | CS22413                                   |
| Knox-14          | CS22414                                   |
| Knox-15          | CS22415                                   |
| Knox-16          | CS22416                                   |
| Knox-17          | CS22417                                   |
| Knox-18          | CS22567                                   |
| Ko-2             | CS1288                                    |
| Koch-1           | CS22823                                   |
| Koch-2           | CS22824                                   |
| Koch-3           | CS22825                                   |
| Koch-4           | CS22826                                   |
| Koch-5           | CS22827                                   |
| Koch-6           | CS22828                                   |
| Koch-7           | CS22829                                   |
| Koch-8           | CS28852                                   |
| Koch-9           | CS28853                                   |
| Kondara          | CS916                                     |
| Kr-0             | CS1296                                    |
| Kro-0            | CS1300                                    |
| Krot-0           | CS3886                                    |

| <b>Accession</b> | <b>ABRC stock number<br/>or reference</b> |
|------------------|-------------------------------------------|
| Krot-1           | CS3887                                    |
| Krot-2           | CS3888                                    |
| Ksk-1            | CS1634                                    |
| Kyoto            | CS3964                                    |
| KZ-1             | CS22606                                   |
| KZ-2             | CS22436                                   |
| KZ-4             | CS22437                                   |
| KZ-6             | CS22438                                   |
| KZ-7             | CS22439                                   |
| KZ-8             | CS22440                                   |
| KZ-9             | CS22607                                   |
| KZ-10            | CS22442                                   |
| KZ-11            | CS22443                                   |
| KZ-12            | CS22444                                   |
| KZ-13            | CS22445                                   |
| La-0             | CS1298                                    |
| La-1             | CS1302                                    |
| Lag1-2           | CS22738                                   |
| Lag1-3           | CS22739                                   |
| Lag1-4           | CS22740                                   |
| Lag1-5           | CS22741                                   |
| Lag1-7           | CS22743                                   |
| Lag1-7           | CS22743                                   |
| Lag1-8           | CS22744                                   |
| Lag1-9           | CS22745                                   |
| Lag2-1           | CS22746                                   |
| Lag2-2           | CS22747                                   |
| Lag2-3           | CS22748                                   |
| Lag2-4           | CS22749                                   |
| Lag2-5           | CS22750                                   |
| Lag2-6           | CS22751                                   |
| Lag2-7           | CS22752                                   |
| Lag2-10          | CS22753                                   |
| Lan-0            | CS1304                                    |
| Laud-1           | CS22555                                   |
| Lc-0             | CS1306                                    |
| Le-0             | CS1308                                    |
| Ler-1            | CS22618                                   |
| Ler-2            | CS8581                                    |

| Accession    | ABRC stock number<br>or reference |
|--------------|-----------------------------------|
| Lerik1-2     | CS22711                           |
| Lerik1-3     | CS22712                           |
| Lerik1-4     | CS22713                           |
| Lerik1-5     | CS22714                           |
| Lerik1-6     | CS22715                           |
| Lerik1-7     | CS22716                           |
| Lerik2-1     | CS22717                           |
| Lerik2-2     | CS22718                           |
| Lerik2-3     | CS22719                           |
| Lerik2-4     | CS22720                           |
| Lerik2-5     | CS22721                           |
| Lerik2-6     | CS22722                           |
| Lerik2-7     | CS22723                           |
| Lerik2-8     | CS22724                           |
| Li-1         | CS1310                            |
| Li-2         | CS1312                            |
| Li-2:1       | CS1314                            |
| Li-3         | CS1316                            |
| Li-3:3       | CS1318                            |
| Li-5         | CS1320                            |
| Li-5:2       | CS1322                            |
| Li-6         | CS1326                            |
| Li-6:1       | CS1328                            |
| Li-7         | CS1330                            |
| Li-8         | CS1332                            |
| Li-10        | CS1334                            |
| Li-11        | CS1651                            |
| Limeport     | CS8070                            |
| LIN          | CS8144                            |
| Lind-1       | CS22556                           |
| Lip-0        | CS1336                            |
| Litva        | CS925                             |
| LL-0         | CS22650                           |
| LI-1         | CS1340                            |
| LI-2         | CS1342                            |
| Lm-2         | CS1344                            |
| Lo-1         | CS1346                            |
| Lo-2         | CS1348                            |
| <b>Loh-0</b> | <b>CS1350</b>                     |

| <b>Accession</b> | <b>ABRC stock number<br/>or reference</b> |
|------------------|-------------------------------------------|
| Lov-1            | CS22574                                   |
| Lov-5            | CS22575                                   |
| Lovel-1          | CS28922                                   |
| Lp2-2            | CS22594                                   |
| Lp2-6            | CS22595                                   |
| Lu-1             | CS1352                                    |
| Lz-0             | CS22615                                   |
| M3385S           | CS3111                                    |
| M7323S           | CS3112                                    |
| M7884S           | CS3113                                    |
| M7943S           | CS3114                                    |
| Ma-0             | CS1356                                    |
| Ma-2             | CS1358                                    |
| Mc-0             | CS1362                                    |
| Me-0             | CS1364                                    |
| Meise-1          | CS28950                                   |
| Meise-2          | CS28951                                   |
| Meise-3          | CS28952                                   |
| Meise-4          | CS28953                                   |
| Meise-5          | CS28954                                   |
| Meise-6          | CS28955                                   |
| Meise-7          | CS28956                                   |
| Meise-8          | CS28957                                   |
| Mh-0             | CS904                                     |
| Mh-1             | CS1368                                    |
| Mir-0            | CS1378                                    |
| Mnz-0            | CS1370                                    |
| Mr-0             | CS22640                                   |
| Mrk-0            | CS22635                                   |
| Ms-0             | CS22655                                   |
| Mt-0             | CS22642                                   |
| Mv-0             | CS1386                                    |
| Mz-0             | CS22636                                   |
| N1               | CS22479                                   |
| N2               | CS22480                                   |
| N3               | CS22481                                   |
| N4               | CS22482                                   |
| N5               | CS22483                                   |
| N6               | CS22484                                   |



| <b>Accession</b> | <b>ABRC stock number<br/>or reference</b> |
|------------------|-------------------------------------------|
| N7               | CS22485                                   |
| N8               | CS22486                                   |
| N9               | CS22487                                   |
| N10              | CS22488                                   |
| N11              | CS22489                                   |
| N12              | CS22490                                   |
| N13              | CS22491                                   |
| N14              | CS22492                                   |
| N15              | CS22493                                   |
| N16              | CS22494                                   |
| N17              | CS22495                                   |
| N18              | CS22496                                   |
| Na-1             | CS1384                                    |
| Nar-1            | CS22725                                   |
| Nar-2            | CS22726                                   |
| Nar-3            | CS22727                                   |
| Nar-4            | CS22728                                   |
| Nar-5            | CS22729                                   |
| Navajo-1         | CS22779                                   |
| Navajo-4         | CS22780                                   |
| Navajo-5         | CS22781                                   |
| Navajo-6         | CS22782                                   |
| Nc-1             | CS1388                                    |
| Nd-0             | CS1390                                    |
| Nd-1             | CS22619                                   |
| Nemrut-1         | CS28917                                   |
| NFA-8            | CS22598                                   |
| NFA-10           | CS22599                                   |
| NFC1             | CS22182                                   |
| NFC2             | CS22183                                   |
| NFC3             | CS22184                                   |
| NFC4             | CS22185                                   |
| NFC5             | CS22186                                   |
| NFC6             | CS22187                                   |
| NFC8             | CS22189                                   |
| NFC9             | CS22190                                   |
| NFC10            | CS22191                                   |
| NFC11            | CS22192                                   |
| NFC13            | CS22194                                   |

| <b>Accession</b> | <b>ABRC stock number<br/>or reference</b> |
|------------------|-------------------------------------------|
| NFC14            | CS22195                                   |
| NFC15            | CS22196                                   |
| NFC16            | CS22197                                   |
| NFC17            | CS22198                                   |
| NFC18            | CS22199                                   |
| NFC20            | CS22201                                   |
| NFE1             | CS22163                                   |
| NFE5             | CS22167                                   |
| NFE6             | CS22168                                   |
| NFE7             | CS22169                                   |
| NFE8             | CS22170                                   |
| NFE9             | CS22171                                   |
| NFE10            | CS22172                                   |
| NFE15            | CS22177                                   |
| NFE16            | CS22178                                   |
| NFE17            | CS22179                                   |
| NFE18            | CS22180                                   |
| NFE19            | CS22181                                   |
| Nie-0            | CS1392                                    |
| No-0             | CS1394                                    |
| Nok-0            | CS1398                                    |
| Nok-1            | CS1400                                    |
| Nok-2            | CS1402                                    |
| Nok-3            | CS22643                                   |
| Np-0             | CS1396                                    |
| Nw-0             | CS1408                                    |
| Nw-1             | CS1410                                    |
| Nw-2             | CS1412                                    |
| Nw-3             | CS1414                                    |
| Nw-4             | CS1416                                    |
| Ob-0             | CS1418                                    |
| Ob-1             | CS1420                                    |
| Ob-2             | CS1422                                    |
| Ob-3             | CS1424                                    |
| Old-1            | CS1426                                    |
| Old-2            | CS1428                                    |
| Omo2-1           | CS22584                                   |
| Omo2-3           | CS22585                                   |
| Or-0             | CS1432                                    |

| Accession     | ABRC stock number<br>or reference |
|---------------|-----------------------------------|
| Ost-0         | CS1430                            |
| Ottb-1        | CS22557                           |
| Ove-0         | CS1434                            |
| Oy-0          | CS22658                           |
| Oy-1          | CS1643                            |
| Pa-1          | CS1438                            |
| Pa-2          | CS1440                            |
| Pa-3          | CS1442                            |
| Pdi-0         | CS1446                            |
| Per-1         | CS1444                            |
| Per-2         | CS1448                            |
| Per-3         | CS1450                            |
| Petergof      | CS926                             |
| Pf-0          | CS1452                            |
| PHW-1         | CS6001                            |
| PHW-2         | CS6002                            |
| PHW-3         | CS6003                            |
| PHW-4         | CS6004                            |
| PHW-5         | CS6005                            |
| PHW-6         | CS6006                            |
| PHW-7         | CS6007                            |
| PHW-9         | CS6009                            |
| PHW-10        | CS6010                            |
| PHW-11        | CS6011                            |
| PHW-12        | CS6012                            |
| PHW-13        | CS6013                            |
| PHW-14        | CS6014                            |
| PHW-15        | CS6015                            |
| PHW-16        | CS6016                            |
| <b>PHW-17</b> | <b>CS6017</b>                     |
| PHW-18        | CS6018                            |
| PHW-19        | CS6019                            |
| PHW-20        | CS6020                            |
| PHW-21        | CS6021                            |
| PHW-22        | CS6022                            |
| PHW-23        | CS6023                            |
| PHW-24        | CS6024                            |
| PHW-25        | CS6025                            |
| PHW-26        | CS6026                            |

| <b>Accession</b> | <b>ABRC stock number<br/>or reference</b> |
|------------------|-------------------------------------------|
| PHW-27           | CS6027                                    |
| PHW-28           | CS6028                                    |
| PHW-29           | CS6029                                    |
| PHW-30           | CS6030                                    |
| PHW-31           | CS6031                                    |
| PHW-32           | CS6032                                    |
| PHW-33           | CS6033                                    |
| PHW-34           | CS6034                                    |
| PHW-35           | CS6035                                    |
| PHW-36           | CS6036                                    |
| PHW-37           | CS6037                                    |
| Pi-0             | CS1454                                    |
| Pi-2             | CS1456                                    |
| Pirin-10         | CS28881                                   |
| Pirin-12         | CS28882                                   |
| Pirin-14         | CS28883                                   |
| Pirin-17         | CS28884                                   |
| Pla-0            | CS1458                                    |
| Pla-1            | CS1460                                    |
| Pla-2            | CS1462                                    |
| Pla-3            | CS1464                                    |
| Pla-4            | CS1466                                    |
| Pn-0             | CS1468                                    |
| Pna-10           | CS22571                                   |
| Pna-17           | CS22570                                   |
| Po-0             | CS1470                                    |
| Po-1             | CS1472                                    |
| Pog-0            | CS1476                                    |
| Por-1            | CS28893                                   |
| Por-3            | CS28894                                   |
| Por-4            | CS28895                                   |
| Por-6            | CS28896                                   |
| Por-7            | CS28897                                   |
| Por-9            | CS28898                                   |
| Por-10           | CS28899                                   |
| Por-11           | CS28900                                   |
| Pr-0             | CS1474                                    |
| Pro-0            | CS22649                                   |
| Pt-0             | CS1478                                    |

| Accession   | ABRC stock number<br>or reference |
|-------------|-----------------------------------|
| Pu2-7       | CS22592                           |
| Pu2-23      | CS22593                           |
| Puent-1     | CS22773                           |
| Puent-3     | CS22774                           |
| Puent-4     | CS22775                           |
| Puent-5     | CS22776                           |
| Puent-6     | CS22777                           |
| Puent-8     | CS22778                           |
| PUZ2        | CS22446                           |
| PUZ5        | CS22448                           |
| PUZ8        | CS22449                           |
| PUZ10       | CS22450                           |
| PUZ16       | CS22451                           |
| PUZ22       | CS22452                           |
| PUZ23       | CS22453                           |
| PUZ24       | CS22454                           |
| PUZ32       | CS22455                           |
| <b>Ra-0</b> | <b>CS22632</b>                    |
| Ragl-1      | CS22558                           |
| Rak-2       | CS1484                            |
| Rasc-1      | CS22559                           |
| RC1058A     | CS22465                           |
| Rd-0        | CS1482                            |
| Ren-1       | CS22610                           |
| Ren-11      | CS22611                           |
| Renk-1      | CS22535                           |
| Rennes-3    | CS22255                           |
| Rennes-5    | CS22257                           |
| Rennes-17   | CS22269                           |
| Rennes-19   | CS22271                           |
| Rennes-20   | CS22272                           |
| Rennes-21   | CS22273                           |
| Rennes-23   | CS22275                           |
| Rennes-24   | CS22276                           |
| Rhen-1      | CS22536                           |
| Ri-0        | CS1492                            |
| RLD-1       | CS913                             |
| RLD-2       | CS1641                            |
| Rmx-A02     | CS22568                           |

| <b>Accession</b> | <b>ABRC stock number<br/>or reference</b> |
|------------------|-------------------------------------------|
| Rmx-A180         | CS22569                                   |
| Rome-1           | CS22524                                   |
| Rou-0            | CS1488                                    |
| RP1              | CS22362                                   |
| RP2              | CS22363                                   |
| RP3              | CS22364                                   |
| RP4              | CS22365                                   |
| RP5              | CS22366                                   |
| RP6              | CS22367                                   |
| RP7              | CS22368                                   |
| RP8              | CS22369                                   |
| RP9              | CS22370                                   |
| RP10             | CS22371                                   |
| RP11             | CS22372                                   |
| RP14             | CS22375                                   |
| RP15             | CS22376                                   |
| RP16             | CS22377                                   |
| RP17             | CS22378                                   |
| RP18             | CS22379                                   |
| RP19             | CS22380                                   |
| RP20             | CS22381                                   |
| RP21             | CS22382                                   |
| RP22             | CS22383                                   |
| RRS-7            | CS22564                                   |
| RRS-10           | CS22565                                   |
| Rsch-0           | CS1490                                    |
| Rsch-4           | CS1494                                    |
| Ru-0             | CS1496                                    |
| Rubezhnoe-1      | CS927                                     |
| Rubezhnoe-2      | CS928                                     |
| S96              | CS914                                     |
| Sah-0            | CS1500                                    |
| San Martin-1     | CS22791                                   |
| San Martin-2     | CS22792                                   |
| San Martin-3     | CS22793                                   |
| San Martin-4     | CS22794                                   |
| San Martin-5     | CS22795                                   |
| San Martin-6     | CS22796                                   |
| San Martin-7     | CS22797                                   |

| <b>Accession</b> | <b>ABRC stock number<br/>or reference</b> |
|------------------|-------------------------------------------|
| San Martin-8     | CS22798                                   |
| Santa Clara      | CS8069                                    |
| Sap-0            | CS1506                                    |
| Sapporo-0        | CS22456                                   |
| Sav-0            | CS1514                                    |
| Se-0             | CS22646                                   |
| Seattle-0        | CS6187                                    |
| Sei-0            | CS1504                                    |
| Sev-1            | CS22764                                   |
| Sf-1             | CS1512                                    |
| Sf-2             | CS1516                                    |
| Sf-2e            | CS1674                                    |
| Sg-1             | CS1519                                    |
| Sg-2             | CS1520                                    |
| Sh-0             | CS1522                                    |
| Sha              | CS22652                                   |
| Si-0             | CS1524                                    |
| Sn(5)-1          | CS6181                                    |
| Sofia-1          | CS28865                                   |
| Sofia-2          | CS28866                                   |
| Sofia-3          | CS28867                                   |
| Sofia-6          | CS28868                                   |
| Sofia-7          | CS28869                                   |
| Sofia-8          | CS28870                                   |
| Sofia-11         | CS28871                                   |
| Sofia-12         | CS28872                                   |
| Sorbo            | CS22653                                   |
| Sp-0             | CS1530                                    |
| Spr1-2           | CS22582                                   |
| Spr1-6           | CS22583                                   |
| SQ-1             | CS22600                                   |
| SQ-4             | CS22243                                   |
| SQ-8             | CS22601                                   |
| St-0             | CS1534                                    |
| Ste-0            | CS1536                                    |
| Stu-1            | CS28862                                   |
| Stu-2            | CS28863                                   |
| Stu-3            | CS28864                                   |
| Stw-0            | CS1538                                    |

| <b>Accession</b> | <b>ABRC stock number<br/>or reference</b> |
|------------------|-------------------------------------------|
| Su-0             | CS1540                                    |
| Ta-0             | CS1548                                    |
| Tac-0            | CS3885                                    |
| Tamm-2           | CS22604                                   |
| Tamm-27          | CS22605                                   |
| Te-0             | CS1550                                    |
| Tha-1            | CS22537                                   |
| Ting-1           | CS22549                                   |
| Tiv-1            | CS22525                                   |
| Tol-0            | CS8020                                    |
| Tol-1            | CS8021                                    |
| Tol-2            | CS8022                                    |
| Tol-3            | CS8023                                    |
| Tol-4            | CS8024                                    |
| Tol-5            | CS8025                                    |
| Tol-6            | CS8026                                    |
| Tol-7            | CS8027                                    |
| Tol-8            | CS8028                                    |
| Tol-9            | CS8029                                    |
| Truk-1           | CS22799                                   |
| Truk-2           | CS22800                                   |
| Truk-3           | CS22801                                   |
| Truk-4           | CS22802                                   |
| Truk-5           | CS22803                                   |
| Truk-6           | CS22804                                   |
| Truk-7           | CS22805                                   |
| Truk-8           | CS22806                                   |
| Trust-1          | CS28918                                   |
| Trust-2          | CS28919                                   |
| Ts-1             | CS22647                                   |
| Ts-2             | CS1554                                    |
| Ts-3             | CS1556                                    |
| Ts-5             | CS22648                                   |
| Ts-6             | CS1560                                    |
| Ts-7             | CS1562                                    |
| Tscha-1          | CS22518                                   |
| Tsu-0            | CS1564                                    |
| Tsu-1            | CS22641                                   |
| Tu-0             | CS1566                                    |



| <b>Accession</b> | <b>ABRC stock number<br/>or reference</b> |
|------------------|-------------------------------------------|
| Tu-1             | CS1568                                    |
| Tul-0            | CS1570                                    |
| Ty-0             | CS1572                                    |
| Uk-1             | CS1574                                    |
| Uk-2             | CS1578                                    |
| Uk-3             | CS1576                                    |
| <b>Uk-4</b>      | <b>CS1580</b>                             |
| Ull2-3           | CS22587                                   |
| Ull2-5           | CS22586                                   |
| Ullapool-1       | CS28966                                   |
| Ullapool-2       | CS28967                                   |
| Ullapool-3       | CS28968                                   |
| Ullapool-4       | CS28969                                   |
| Ullapool-5       | CS28970                                   |
| Ullapool-6       | CS28971                                   |
| Ullapool-8       | CS28972                                   |
| Uod-1            | CS22612                                   |
| Uod-7            | CS22613                                   |
| Utrecht          | CS6150                                    |
| Van-0            | CS22627                                   |
| Var2-1           | CS22580                                   |
| Var2-6           | CS22581                                   |
| Vash-1           | CS22754                                   |
| Ven-1            | CS22538                                   |
| Ven-2            | CS22539                                   |
| Vi-0             | CS1582                                    |
| Vind-1           | CS22560                                   |
| Vorst-1          | CS28923                                   |
| Vorst-2          | CS28924                                   |
| Vorst-3          | CS28925                                   |
| Vorst-4          | CS28926                                   |
| Vorst-5          | CS28927                                   |
| Vorst-6          | CS28928                                   |
| Vorst-7          | CS28929                                   |
| Vorst-8          | CS28930                                   |
| Vorst-9          | CS28931                                   |
| Vorst-10         | CS28932                                   |
| Vorst-11         | CS28933                                   |
| Vorst-12         | CS28934                                   |

| <b>Accession</b> | <b>ABRC stock number<br/>or reference</b> |
|------------------|-------------------------------------------|
| Vorst-13         | CS28935                                   |
| Vorst-14         | CS28936                                   |
| Vorst-15         | CS28937                                   |
| Wa-1             | CS22644                                   |
| Wag-1            | CS22540                                   |
| Wag-2            | CS22541                                   |
| Wag-3            | CS22542                                   |
| Wag-4            | CS22543                                   |
| Wag-5            | CS22544                                   |
| Wag-5            | CS22544                                   |
| Wag-6            | CS22545                                   |
| WAR              | CS8143                                    |
| Wc-1             | CS1588                                    |
| Wc-2             | CS1590                                    |
| Wei-0            | CS3110                                    |
| Werl-1           | CS22546                                   |
| Wil-1            | CS1594                                    |
| Wil-2            | CS1596                                    |
| Wil-3            | CS1598                                    |
| WI-0             | CS1630                                    |
| Ws               | CS915                                     |
| Ws-0             | CS22623                                   |
| Ws-1             | CS2223                                    |
| Ws-2             | CS22659                                   |
| Ws-3             | CS1638                                    |
| Ws-4             | CS5390                                    |
| Wt-1             | CS1604                                    |
| Wt-2             | CS1606                                    |
| Wt-3             | CS1608                                    |
| Wt-4             | CS1610                                    |
| Wt-5             | CS22637                                   |
| Wu-0             | CS1614                                    |
| X-0              | CS1616                                    |
| Xan-1            | CS22703                                   |
| <b>Xan-2</b>     | <b>CS22704</b>                            |
| Xan-3            | CS22705                                   |
| Xan-4            | CS22706                                   |
| <b>Xan-5</b>     | <b>CS22707</b>                            |
| Xan-6            | CS22708                                   |

| Accession | ABRC stock number<br>or reference |
|-----------|-----------------------------------|
| Xan-7     | CS22709                           |
| Xan-8     | CS22710                           |
| XX-0      | CS1618                            |
| XXX-0     | CS1620                            |
| Yeg-1     | CS22765                           |
| Yeg-2     | CS22766                           |
| Yeg-3     | CS22767                           |
| Yeg-4     | CS22768                           |
| Yeg-5     | CS22769                           |
| Yeg-6     | CS22770                           |
| Yeg-7     | CS22771                           |
| Yeg-8     | CS22772                           |
| Yo-0      | CS22624                           |
| Zab-1     | CS28909                           |
| Zab-2     | CS28910                           |
| Zab-3     | CS28911                           |
| Zab-7     | CS28913                           |
| Zab-9     | CS28914                           |
| Zab-11    | CS28915                           |
| Zab-13    | CS28916                           |
| Zdr-1     | CS22588                           |
| Zdr-6     | CS22589                           |
| Zloc-1    | CS28873                           |
| Zloc-2    | CS28874                           |
| Zloc-3    | CS28875                           |
| Zloc-5    | CS28876                           |
| Zloc-6    | CS28877                           |
| Zloc-7    | CS28878                           |
| Zloc-10   | CS28879                           |
| Zloc-11   | CS28880                           |
| Zu-0      | CS1626                            |
| Zu-1      | CS1628                            |

Highlighted in purple are those accessions that were resistant to *Pst* DC3000 infection.

**Table S4.**  $\chi^2$  goodness-of-fit test between the observed and expected segregation for the resistance to *Pseudomonas syringae* pv. *tomato* DC3000 in F<sub>2</sub> populations derived from crosses between resistant and susceptible accessions.

|                                       | Observed phenotype |     |    |       | Expected genotype, 1 gene |     |     |               | Expected genotype, 2 genes                                  |                    |                                                             |               |
|---------------------------------------|--------------------|-----|----|-------|---------------------------|-----|-----|---------------|-------------------------------------------------------------|--------------------|-------------------------------------------------------------|---------------|
|                                       | R                  | U   | S  | Total | RR                        | Rr  | rr  | $\chi^2$ test | R <sub>a</sub> R <sub>a</sub> R <sub>b</sub> R <sub>b</sub> | R <sub>x</sub> ___ | r <sub>a</sub> r <sub>a</sub> r <sub>b</sub> r <sub>b</sub> | $\chi^2$ test |
| Bu-22 ♀ x<br>Col-0 ♂ F <sub>2</sub>   | 84                 | 214 | 83 | 381   | 95                        | 191 | 95  | <b>0.05</b>   | 24                                                          | 333                | 24                                                          | 0.00          |
| CIBC-16 ♀<br>x Col-0 ♂ F <sub>2</sub> | 98                 | 334 | 44 | 476   | 119                       | 238 | 119 | 0.00          | 30                                                          | 417                | 30                                                          | 0.00          |
| Ra-0 ♀ x<br>Col-0 ♂ F <sub>2</sub>    | 126                | 87  | 17 | 230   | 58                        | 115 | 58  | 0.00          | 14                                                          | 201                | 14                                                          | 0.00          |
| Xan-5 ♀ x<br>Col-0 ♂ F <sub>2</sub>   | 205                | 223 | 43 | 471   | 118                       | 236 | 118 | 0.00          | 29                                                          | 412                | 29                                                          | 0.00          |

Rejection of the H<sub>0</sub> implies that the segregation does not follow the expected segregation for 1 or 2 resistance loci. Highlighted in bold is the  $\chi^2$  test that followed an expected segregation. The conclusions would be unchanged even if the resistance would be a recessive trait. Abbreviations: R = Resistant; U = Undetermined; and S = Susceptible.

**Table S5.** List of *Pseudomonas syringae* pv. *tomato* (Pst) DC3000 effectors and the effector gene cluster to which they belong.

| Cluster     | Effector              | Gene identifier   |
|-------------|-----------------------|-------------------|
|             | <i>hopK1</i>          | PSPTO_0044        |
|             | <i>hopY1</i>          | PSPTO_0061        |
| I           | <i>hopU1</i>          | PSPTO_0501        |
| I           | <i>hopF2</i>          | PSPTO_0502        |
| II          | <i>hopH1</i>          | PSPTO_0588        |
| II          | <i>hopC1</i>          | PSPTO_0589        |
| IV          | <i>hopD1</i>          | PSPTO_0876        |
| IV          | <i>hopQ1-1</i>        | PSPTO_0877        |
| IV          | <i>hopR1</i>          | PSPTO_0883        |
|             | <i>hopAM1-1</i>       | PSPTO_1022        |
| CEL         | <i>hopN1</i>          | PSPTO_1370        |
| CEL         | <i>hopAA1-1</i>       | PSPTO_1372        |
| CEL         | <i>hopM1</i>          | PSPTO_1375        |
| CEL         | <i>avrE</i>           | PSPTO_1377        |
|             | <i>hopB1</i>          | PSPTO_1406        |
|             | <i>hopAF1</i>         | PSPTO_1568        |
|             | <i>avrPtoB</i>        | PSPTO_3087        |
|             | <i>avrPto</i>         | PSPTO_4001        |
|             | <i>hopE1</i>          | PSPTO_4331        |
| <b>VIII</b> | <b><i>hopS2</i></b>   | <b>PSPTO_4588</b> |
| <b>VIII</b> | <b><i>hopT2</i></b>   | <b>PSPTO_4590</b> |
| <b>VIII</b> | <b><i>hopO1-3</i></b> | <b>PSPTO_4592</b> |
| <b>VIII</b> | <b><i>hopT1-2</i></b> | <b>PSPTO_4593</b> |
| <b>VIII</b> | <b><i>hopO1-2</i></b> | <b>PSPTO_4594</b> |
| <b>VIII</b> | <b><i>hopS1</i></b>   | <b>PSPTO_4597</b> |
|             | <b><i>hopAD1</i></b>  | <b>PSPTO_4691</b> |
| IX          | <i>hopAA1-2</i>       | PSPTO_4718        |
| IX          | <i>hopV1</i>          | PSPTO_4720        |
| IX          | <i>hopAO1</i>         | PSPTO_4722        |
| IX          | <i>hopG1</i>          | PSPTO_4727        |
|             | <i>hopI1</i>          | PSPTO_4776        |
|             | <i>hopA1</i>          | PSPTO_5354        |
|             | <b><i>hopBM1</i></b>  | <b>PSPTO_5633</b> |
| X           | <i>hopAM1-2</i>       | PSPTO_A0005       |
| X           | <i>hopX1</i>          | PSPTO_A0012       |
| X           | <i>hopO1-1</i>        | PSPTO_A0018       |
| X           | <i>hopT1-1</i>        | PSPTO_A0019       |

Effectors highlighted in bold are still present in strain *Pst*  $\Delta 28E$ . Effectors in cluster VIII are potentially pseudogenes.

**Table S6.** Search for the effector responsible for the accelerated cell death response in *Pseudomonas syringae* pv. *tomato* (*Pst*) DC3000-resistant accessions.

(a) Cell death phenotype 93 hours after infiltration with a high inoculum ( $10^8$  CFU ml<sup>-1</sup>) of effectorless *Pst* DC3000 strain (*Pst*  $\Delta$ 28E).

| Accession | No | <i>Pst</i> $\Delta$ 28E |           | Total |
|-----------|----|-------------------------|-----------|-------|
|           |    | Partial                 | Collapsed |       |
| Col-0     | 8  | 0                       | 0         | 8     |
| Bu-22     | 8  | 0                       | 0         | 8     |
| Bu-25     | 8  | 0                       | 0         | 8     |
| Xan-5     | 8  | 0                       | 0         | 8     |

Eight leaves from 8 different plants were infiltrated. Cell death was evaluated into 3 categories: (1) No leaf area showing necrosis symptoms. (2) Partial necrosis symptoms. (3) Fully collapsed leaf. No differences were observed between the response to bacterial inoculation of the three resistant accessions to that of Col-0, as determined by a Fisher's exact test ( $P < 0.0125$ ).

(b) Cell death phenotype 26 hours after infiltration with a high inoculum ( $10^8$  CFU ml<sup>-1</sup>) of *Pst* DC3000 effector polymutant strains.

| Accession    | <i>Pst</i> $\Delta I\Delta II\Delta IV\Delta IX\Delta X$ |           |           |       | <i>Pst</i> $\Delta CEL$ |          |           |       |
|--------------|----------------------------------------------------------|-----------|-----------|-------|-------------------------|----------|-----------|-------|
|              | No                                                       | Partial   | Collapsed | Total | No                      | Partial  | Collapsed | Total |
| Col-0        | 16                                                       | 0         | 0         | 16    | 16                      | 0        | 0         | 16    |
| <b>Bu-22</b> | <b>0</b>                                                 | <b>13</b> | <b>3</b>  | 16    | <b>0</b>                | <b>8</b> | <b>8</b>  | 16    |
| <b>Bu-25</b> | <b>2</b>                                                 | <b>11</b> | <b>3</b>  | 16    | <b>4</b>                | <b>8</b> | <b>4</b>  | 16    |
| <b>Xan-5</b> | <b>3</b>                                                 | <b>13</b> | <b>0</b>  | 16    | <b>0</b>                | <b>8</b> | <b>8</b>  | 16    |

Sixteen leaves from 16 individual plants were infiltrated per strain. *Pst*  $\Delta I\Delta II\Delta IV\Delta IX\Delta X$  strain has 5 clusters of effectors deleted (15 effectors deleted) while *Pst*  $\Delta CEL$  has 1 cluster of effectors, the Conserved effector locus, deleted (4 effectors deleted). Cell death was evaluated into 3 categories: (1) No leaf area showing necrosis symptoms. (2) Partial necrosis symptoms. (3) Fully collapsed leaf. Highlighted in purple are those accessions whose response to bacterial inoculation was different from Col-0, as determined by a Fisher's exact test ( $P < 0.0125$ ).



(c) Cell death phenotype 24 hours after infiltration with a high inoculum ( $10^8$  CFU ml<sup>-1</sup>) of *Pst*  $\Delta avrPto\Delta avrPtoB$ .

| Accession    | <i>Pst</i> $\Delta avrPto\Delta avrPtoB$ |           |           | Total |
|--------------|------------------------------------------|-----------|-----------|-------|
|              | No                                       | Partial   | Collapsed |       |
| Col-0        | 13                                       | 2         | 0         | 15    |
| <b>Bu-22</b> | <b>5</b>                                 | <b>10</b> | <b>0</b>  | 15    |
| Bu-25        | 8                                        | 2         | 0         | 10    |
| <b>Xan-5</b> | <b>6</b>                                 | <b>5</b>  | <b>4</b>  | 15    |

At least 10 leaves from 10 individual plants were infiltrated. Cell death was evaluated into 3 categories: (1) No leaf area showing necrosis symptoms. (2) Partial necrosis symptoms. (3) Fully collapsed leaf. Highlighted in purple are those accessions whose response to bacterial inoculation was different from Col-0, as determined by a Fisher's exact test ( $P < 0.0125$ ).

**Table S7.** HopAM1 may be responsible for the accelerated cell death observed in accession Xan-5.

| Accession | <i>Pst</i> $\Delta$ 28E |           | <i>Pst</i> $\Delta$ 28E<br>+ <i>hopK1</i> |           | <i>Pst</i> $\Delta$ 28E<br>+ <i>hopY1</i> |           | Total |
|-----------|-------------------------|-----------|-------------------------------------------|-----------|-------------------------------------------|-----------|-------|
|           | No                      | Chlorosis | No                                        | Chlorosis | No                                        | Chlorosis |       |
| Col-0     | 6                       | 0         | 6                                         | 0         | 6                                         | 0         | 6     |
| Bu-22     | 6                       | 0         | 6                                         | 0         | 6                                         | 0         | 6     |
| Bu-25     | 6                       | 0         | 6                                         | 0         | 6                                         | 0         | 6     |
| Xan-5     | 4                       | 0         | 4                                         | 0         | 4                                         | 0         | 4     |

  

| Accession | <i>Pst</i> $\Delta$ 28E<br>+ <i>hopAM1</i> |           | <i>Pst</i> $\Delta$ 28E<br>+ <i>hrpK1-hopB1</i> |           | <i>Pst</i> $\Delta$ 28E<br>+ <i>hopAF1</i> |           | Total |
|-----------|--------------------------------------------|-----------|-------------------------------------------------|-----------|--------------------------------------------|-----------|-------|
|           | No                                         | Chlorosis | No                                              | Chlorosis | No                                         | Chlorosis |       |
| Col-0     | 6                                          | 0         | 6                                               | 0         | 6                                          | 0         | 6     |
| Bu-22     | 6                                          | 0         | 6                                               | 0         | 6                                          | 0         | 6     |
| Bu-25     | 4                                          | 2         | 6                                               | 0         | 6                                          | 0         | 6     |
| Xan-5     | <b>0</b>                                   | <b>4</b>  | 4                                               | 0         | 4                                          | 0         | 4     |

  

| Accession | <i>Pst</i> $\Delta$ 28E<br>+ <i>hopE1</i> |           | <i>Pst</i> $\Delta$ 28E<br>+ <i>hopI1</i> |           | <i>Pst</i> $\Delta$ 28E<br>+ <i>shcA-hopA1</i> |           | Total |
|-----------|-------------------------------------------|-----------|-------------------------------------------|-----------|------------------------------------------------|-----------|-------|
|           | No                                        | Chlorosis | No                                        | Chlorosis | No                                             | Chlorosis |       |
| Col-0     | 6                                         | 0         | 6                                         | 0         | 6                                              | 0         | 6     |
| Bu-22     | 6                                         | 0         | 6                                         | 0         | 6                                              | 0         | 6     |
| Bu-25     | 6                                         | 0         | 6                                         | 0         | 6                                              | 0         | 6     |
| Xan-5     | 4                                         | 0         | 4                                         | 0         | 4                                              | 0         | 4     |

Cell death phenotype 93 to 96 hours after infiltration with a high inoculum ( $10^8$  CFU ml<sup>-1</sup>) of effectorless *Pseudomonas syringae* pv. *tomato* (*Pst*) DC3000 strain and strains complemented with individual effectors. Four to six leaves from 4 - 6 different plants were infiltrated per strain. *Pst*  $\Delta 28E$  has 28 effectors deleted. Individual effectors (if necessary, with their corresponding chaperone) were expressed from a broad-host range plasmid under the control of their endogenous promoter, and the plasmids were introduced into *Pst*  $\Delta 28E$ . Cell death was evaluated into 2 categories: (1) No = No symptoms. (2) Chlorosis = Leaf showed chlorotic symptoms. Highlighted in purple are those accessions whose response to bacterial inoculation was different from Col-0, as determined by a Fisher's exact test ( $P < 0.0125$ ).

**Table S8.** Arabidopsis accessions and the mechanism of resistance against *Pseudomonas syringae* pv. *tomato* identified in this study.

| <b>Accession</b> | <b>Mechanism of resistance</b> |
|------------------|--------------------------------|
| Belm-12          | Elevated SA accumulation       |
| Bu-22            | ETI                            |
| Bu-25            | ETI                            |
| CIBC-16          | Elevated SA accumulation       |
| CO               | ETI-like                       |
| Co-3             | Unknown                        |
| Es-0             | Surface based                  |
| Est-1            | Elevated SA accumulation       |
| Loh-0            | Surface based                  |
| PHW-17           | Unknown                        |
| Ra-0             | Unknown                        |
| Uk-4             | ETI-like                       |
| Xan-2            | ETI-like                       |
| Xan-5            | ETI-like                       |

Abbreviations: ETI = effector-triggered immunity, SA = salicylic acid.

## SUPPORTING INFORMATION MATERIALS AND METHODS

**Methods S1.** Crosses between *Arabidopsis* accessions.

*Pseudomonas syringae* pv. *tomato* (*Pst*) DC3000-susceptible Col-0 plants were crossed to *Pst* DC3000-resistant accessions Bu-22, CIBC-16, Ra-0, and Xan-5 using both parents in reciprocal crosses as male and female. To confirm that the F<sub>1</sub> plants were true crosses, genomic DNA was extracted using the method of Edwards *et al.* (1991) and PCR of these genomic DNA samples was performed using molecular markers nga139, nga151a, and nga171 (Berendzen *et al.*, 2005) and GoTaq® DNA polymerase (Promega).

**Methods S2.** Next-generation sequencing and SHOREmap mapping of resistance loci.

The genomic DNA of the F<sub>2</sub> parents and bulks was extracted using the Wizard® genomic DNA purification kit (Promega) following manufacturer's recommendations. After genomic DNA quantification using the Qubit® dsDNA HS assay kit (Thermo Fisher Scientific), equimolar amounts of genomic DNA were mixed to prepare the resistant and susceptible F<sub>2</sub> bulks. Samples were sequenced using the rapid run of the Illumina HiSeq 2500 system to obtain paired-end 250-bp reads. Reads were trimmed with Cutadapt (version 1.8.1; Martin, 2011), aligned to the TAIR10 Col-0 reference genome using Bowtie (version 2.2.3; Langmead & Salzberg, 2012), processed using SAMTools (version 0.1.19; Li *et al.*, 2009) and mapped using SHOREmap (version 3; Sun & Schneeberger, 2015).

**Methods S3.** Statistical analyses.

Mean comparisons within treatments were performed using Prism 6 (GraphPad Software, Inc.). Individual mean comparisons were done with a Student's *t*-test ( $P < 0.05$ ), while multiple mean comparisons used a Dunnett's test (for comparing means to a control;  $P < 0.05$ ) or a Tukey's HSD test (to compare all means within an experiment;  $P < 0.05$ ). If the treatments within an experiment did not have

homogeneous variances (as determined by a Brown-Forsythe test;  $P < 0.05$ ), a  $\log_{10}$  transformation to the data was applied before performing the mean comparisons.

Fisher's exact tests ( $P < 0.05$ ), after a Bonferroni correction for the multiple comparisons performed (in which the significance level was divided by the number of comparisons being made), were used to compare the speed of the cell death response. Comparisons were made using an online tool (Kirkman, 1996).

A  $\chi^2$  goodness-of-fit test was used to determine if the segregation of resistance to *Pseudomonas syringae* pv. *tomato* DC3000 in  $F_2$  populations followed a particular expected segregation ( $P < 0.05$ ).

## SUPPORTING INFORMATION NOTES

### Notes S1: References

**Alfano JR, Charkowski AO, Deng W-L, Badel JL, Petnicki-Ocwieja T, van Dijk K, Collmer A. 2000.** The *Pseudomonas syringae* Hrp pathogenicity island has a tripartite mosaic structure composed of a cluster of type III secretion genes bounded by exchangeable effector and conserved effector loci that contribute to parasitic fitness and pathogenicity in plants. *Proceedings of the National Academy of Sciences, USA* **97**: 4856–4861.

**Berendzen K, Searle I, Ravenscroft D, Koncz C, Batschauer A, Coupland G, Somssich IE, Ulker B. 2005.** A rapid and versatile combined DNA/RNA extraction protocol and its application to the analysis of a novel DNA marker set polymorphic between *Arabidopsis thaliana* ecotypes Col-0 and Landsberg *erecta*. *Plant methods* **1**: 4.

**Cunnac S, Chakravarthy S, Kvitko BH, Russell AB, Martin GB, Collmer A. 2011.** Genetic disassembly and combinatorial reassembly identify a minimal functional repertoire of type III effectors in *Pseudomonas syringae*. *Proceedings of the National Academy of Sciences, USA* **108**: 2975–2980.

**Dittmar EL, Oakley CG, Ågren J, Schemske DW. 2014.** Flowering time QTL in natural populations of *Arabidopsis thaliana* and implications for their adaptive value. *Molecular Ecology* **23**: 4291–4303.

**Edwards K, Johnstone C, Thompson C. 1991.** A simple and rapid method for the preparation of plant genomic DNA for PCR analysis. *Nucleic Acids Research* **19**: 1349.

**Kirkman TW. 1996.** *Statistics to use*. [WWW document] URL <http://www.physics.csbsju.edu/stats/>. [accessed 1 September 2016].

**Kvitko BH, Park DH, Velásquez AC, Wei CF, Russell AB, Martin GB, Schneider DJ, Collmer A. 2009.** Deletions in the repertoire of *Pseudomonas*

*syringae* pv. *tomato* DC3000 type III secretion effector genes reveal functional overlap among effectors. *PLoS Pathogens* **5**: e1000388.

**Langmead B, Salzberg SL. 2012.** Fast gapped-read alignment with Bowtie 2. *Nature Methods* **9**: 357–359.

**Landgraf A, Weingart H, Tsiamis G, Boch J. 2006.** Different versions of *Pseudomonas syringae* pv. *tomato* DC3000 exist due to the activity of an effector transposon. *Molecular Plant Pathology* **7**: 355–364.

**Li H, Handsaker B, Wysoker A, Fennell T, Ruan J, Homer N, Marth G, Abecasis G, Durbin R, 1000 Genome Project Data Processing Subgroup. 2009.** The Sequence Alignment/Map format and SAMtools. *Bioinformatics* **25**: 2078–2079.

**Lin NC, Martin GB. 2005.** An *avrPto/avrPtoB* mutant of *Pseudomonas syringae* pv. *tomato* DC3000 does not elicit Pto-mediated resistance and is less virulent on tomato. *Molecular Plant-Microbe Interactions* **18**: 43–51.

**Martin M. 2011.** Cutadapt removes adapter sequences from high-throughput sequencing reads. *EMBnet.journal* **17**: 10–12.

**Puri N, Jenner C, Bennett M, Stewart R, Mansfield J, Lyons N, Taylor J. 1997.** Expression of *avrPphB*, an avirulence gene from *Pseudomonas syringae* pv. *phaseolicola*, and the delivery of signals causing the hypersensitive reaction in bean. *Molecular Plant-Microbe Interactions* **10**: 247–256.

**Ronald PC, Salmeron JM, Carland FM, Staskawicz BJ. 1992.** The cloned avirulence gene *avrPto* induces disease resistance in tomato cultivars containing the *Pto* resistance gene. *Journal of Bacteriology* **174**: 1604–1611.

**Sun H, Schneeberger K. 2015.** SHOREmap v3.0: fast and accurate identification of causal mutations from forward genetic screens. *Methods in Molecular Biology* **1284**: 381–395.

**Wei W, Plovanich-Jones A, Deng WL, Jin QL, Collmer A, Huang HC, He SY. 2000.** The gene coding for the Hrp pilus structural protein is required for type III secretion of Hrp and Avr proteins in *Pseudomonas syringae* pv. *tomato*. *Proceedings of the National Academy of Sciences USA* **97**: 2247–2252.



**Xin XF, Nomura K, Aung K, Velásquez AC, Yao J, Boutrot F, Chang JH, Zipfel C, He SY. 2016.** Bacteria establish an aqueous living space as a crucial virulence mechanism. *Nature* **539**: 524–529.

**Zwiesler-Vollick J, Plovanich-Jones AE, Nomura K, Bandyopadhyay S, Joardar V, Kunkel BN, He SY. 2002.** Identification of novel hrp-regulated genes through functional genomic analysis of the *Pseudomonas syringae* pv. *tomato* DC3000 genome. *Molecular Microbiology* **45**: 1207–1218.
